# Supplementary material for: AP4 positively regulates LAPTM4B to promote hepatocellular carcinoma growth and metastasis, while reducing chemotherapy sensitivity
Source: PubMed Central journal article supplement (PMC5830630; doi:10.1002/1878-0261.12171), 2018-02-06
Supplement: MOL2-12-373-s001.pdf [file MOL2-12-373-s001.pdf]

**FigureS1.** The result of TF activation profiling plate assay. (a) The result of TF activation profiling plate assay in LPTM4B\*1 promoter. (b) The result of TF activation profiling plate assay in LPTM4B\*1 promoter. The factors with asterisk represent binding factors, which means the HepG2 nuclear protein+LPTM4B promoter group compete more than 3-folds protein than HepG2 nuclear protein group and each factor's value of chemiluminescence must be above 100.

BEL-7402 LO2

1/2

1/1

M

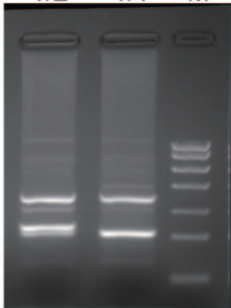

340bp

223bp

204bp

500 bp

400 bp

300 bp

200 bp

100 bp

**FigureS2.** Genotyping of LAPTM4B. M is DNA marker. LO2 genotype is LAPTM4B\*1/1. BEL-7402 genotype is LAPTM4B\*1/2. 204bp is the LAPTM4B\*1 allele sequence, 223bp is the LAPTM4B\*2 allele sequence, 340bp is the  $\beta$ -actin sequence.

a

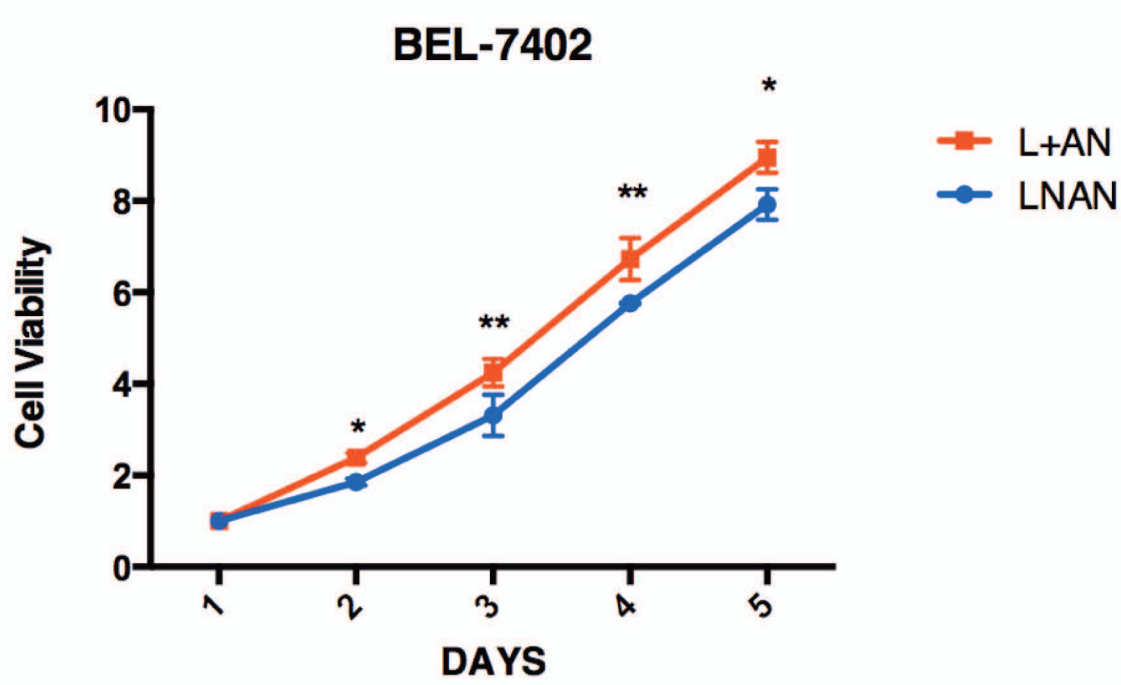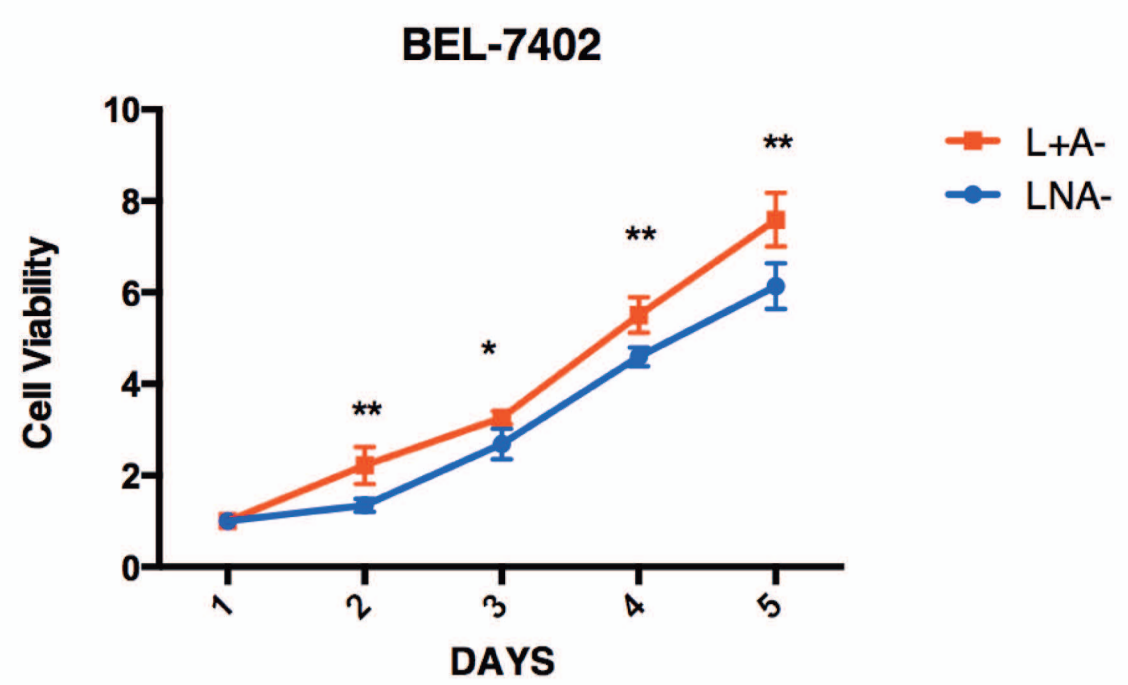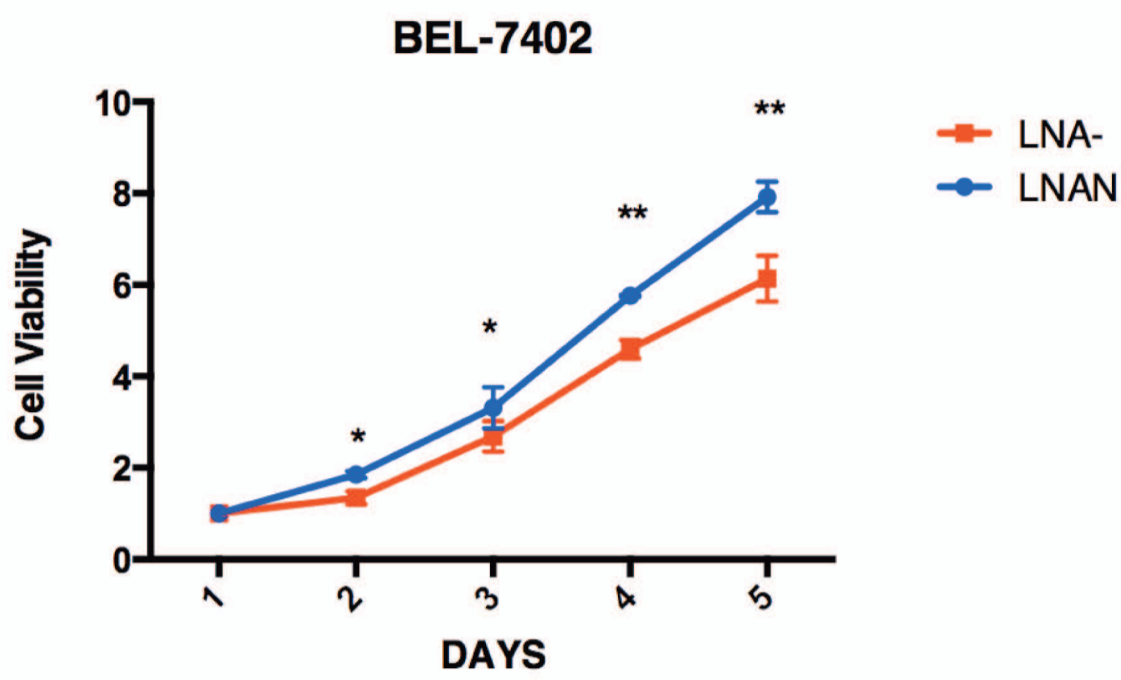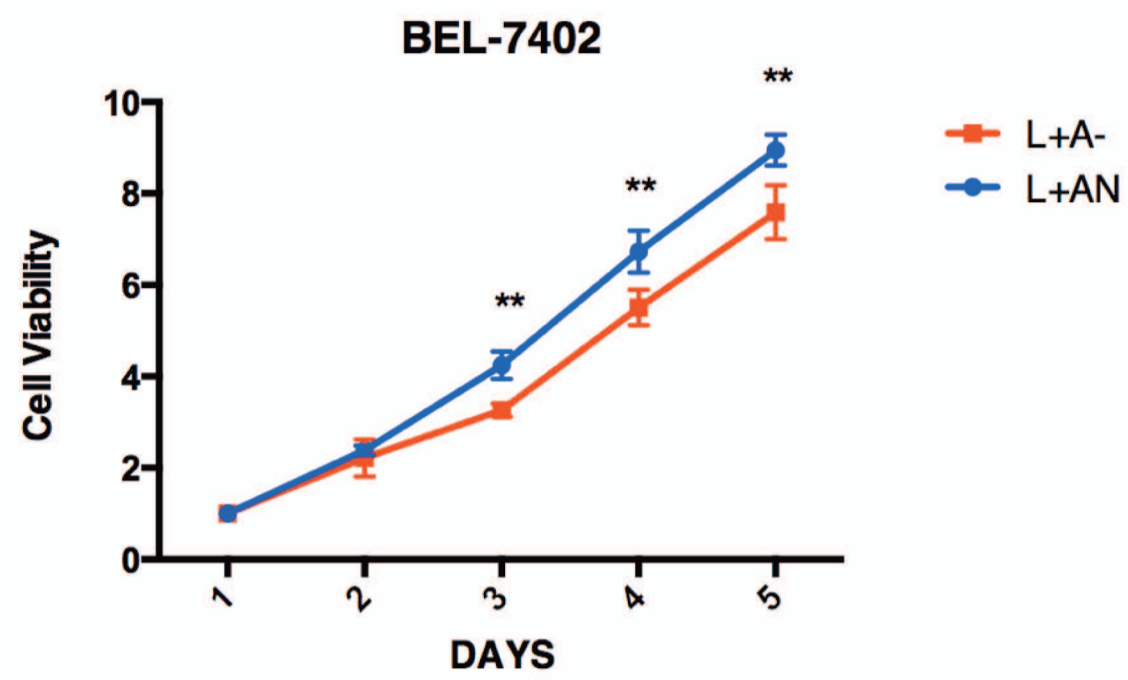

b

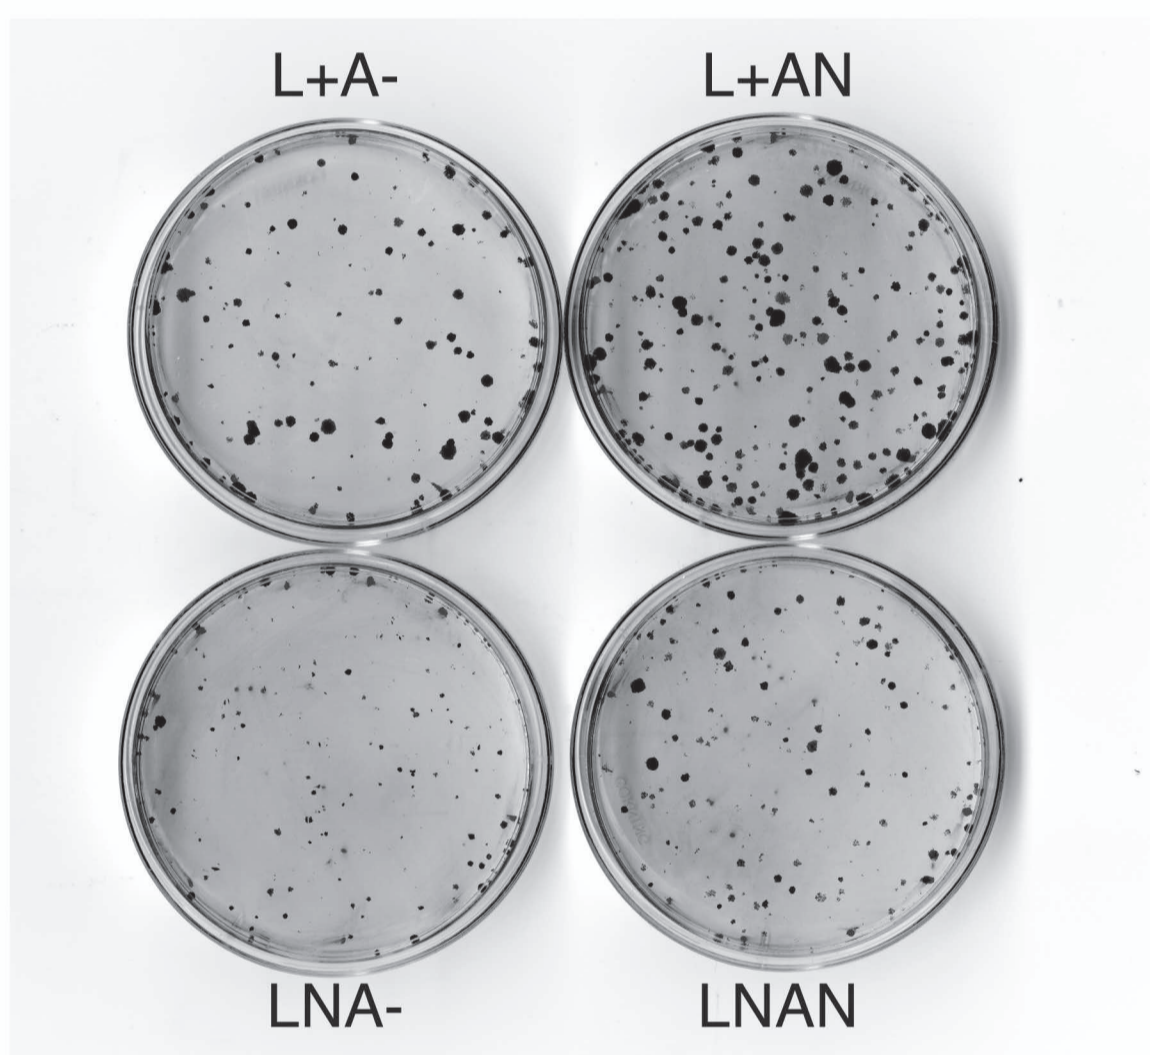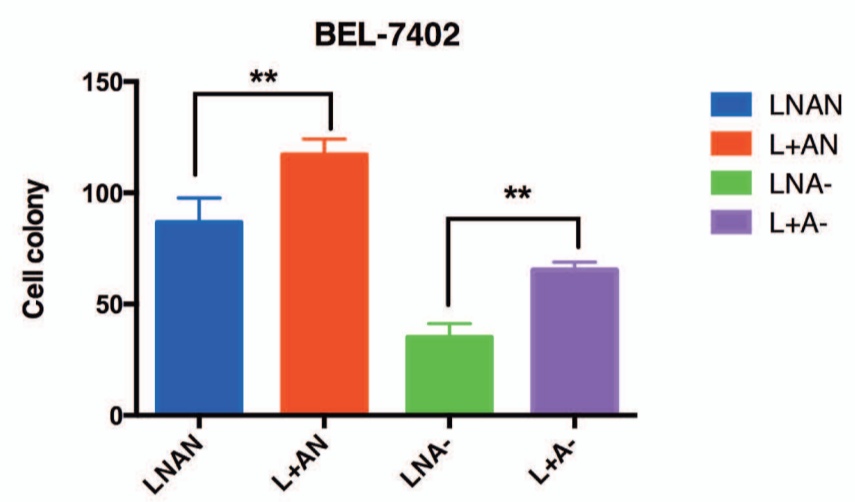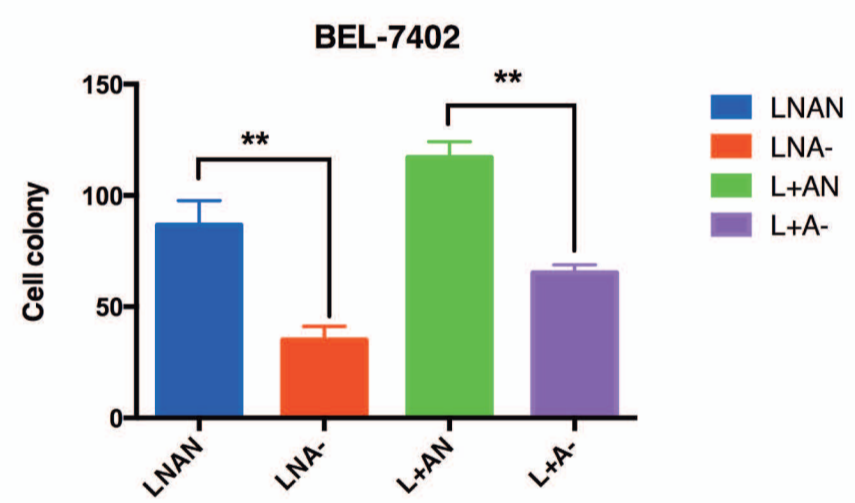

c

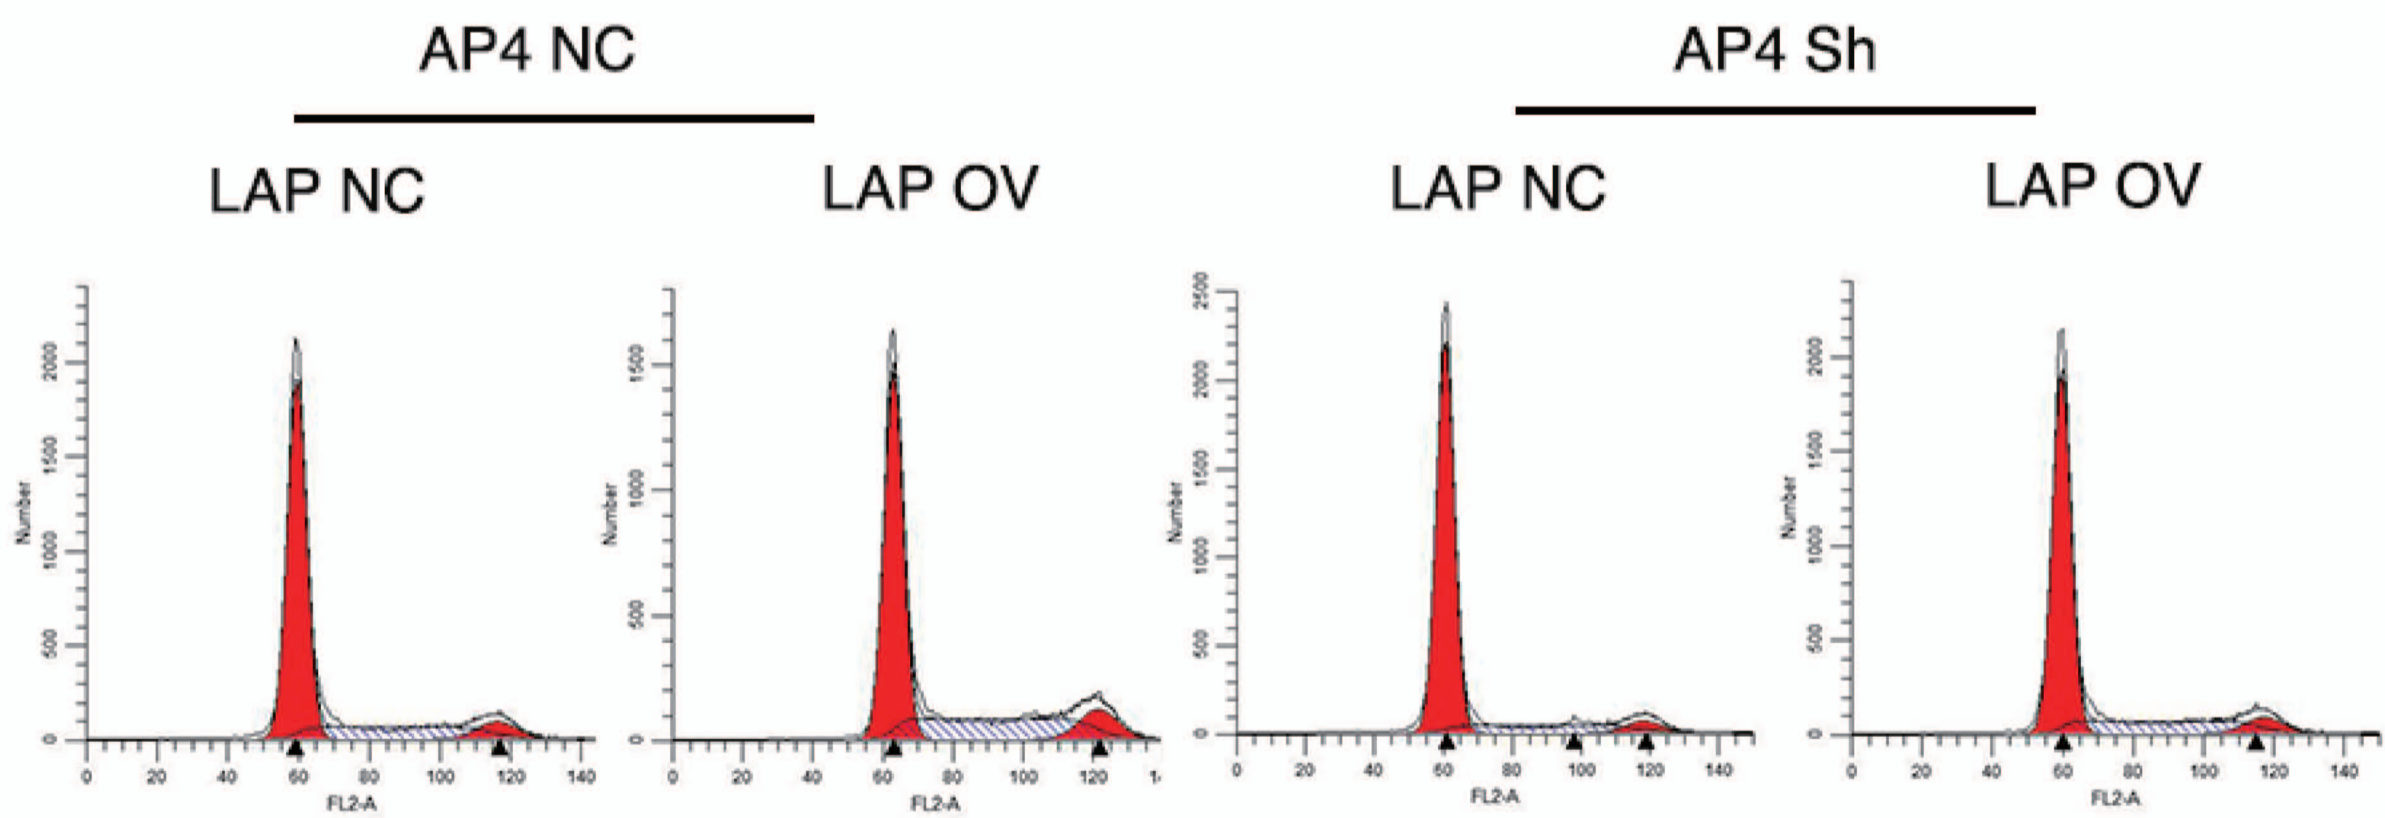**BEL-7402**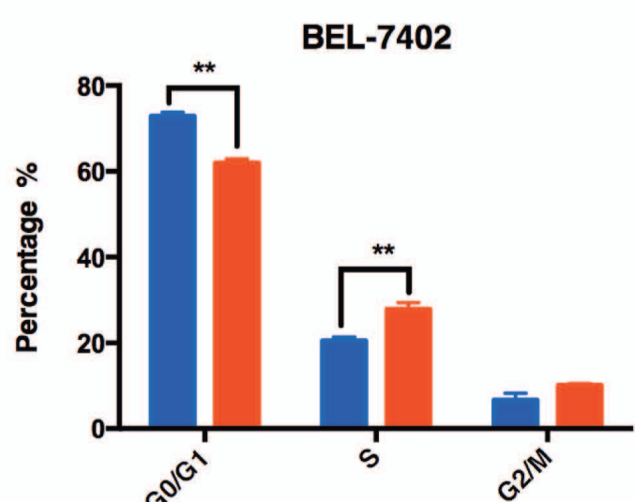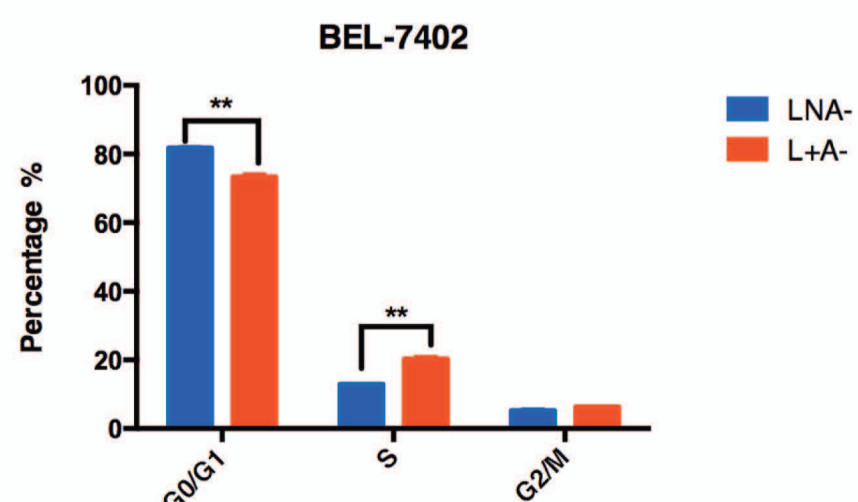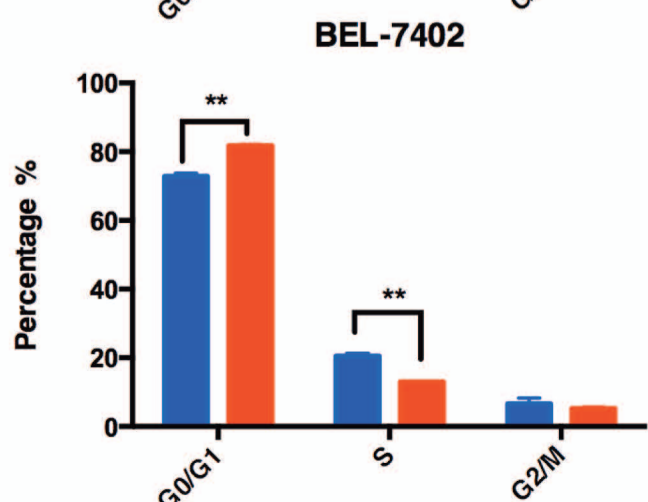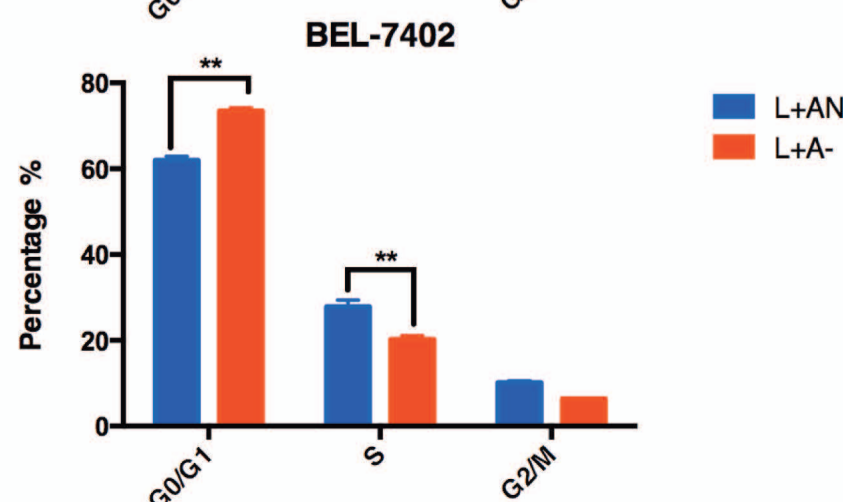

**FigureS3.** AP4 promotes HCC cell growth via LAPTM4B by affecting cell proliferation and cell cycle *in vitro* and *in vivo*. **(a-b)** Overexpression of LAPTM4B partially but significantly rescued the cell growth arrest induced by TFAP4 knockdown in BEL-7402 cells, as measured by the cell viability assay and colony formation (\*P<0.05, \*\* P<0.01). **(c)** Restoration of LAPTM4B significantly reversed the cycle arrest at G1 phase induced by AP4 knockdown in BEL-7402 cells. (n=3, mean  $\pm$  s.d.).



a1

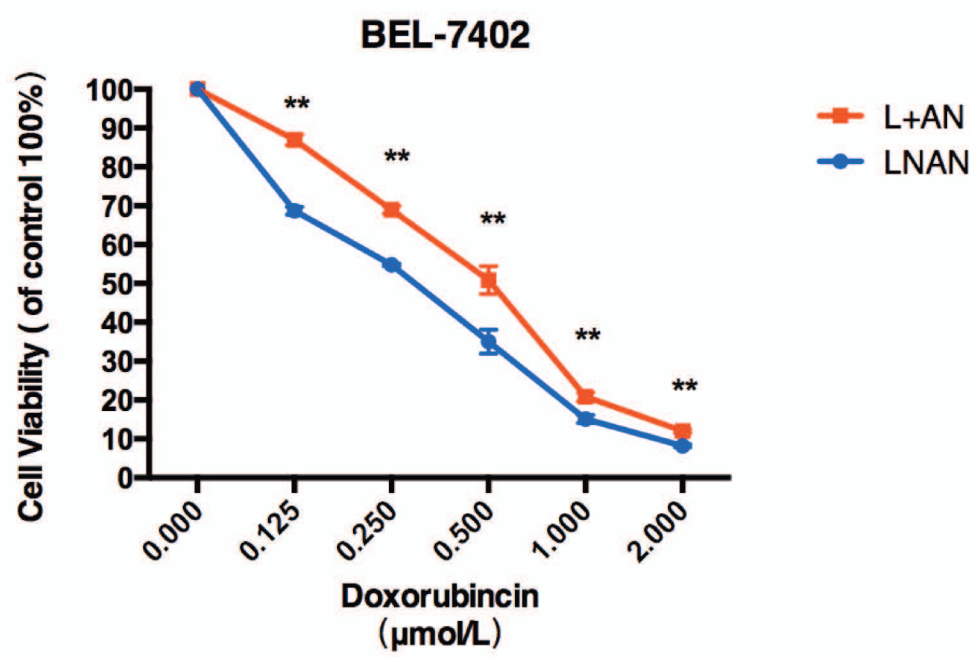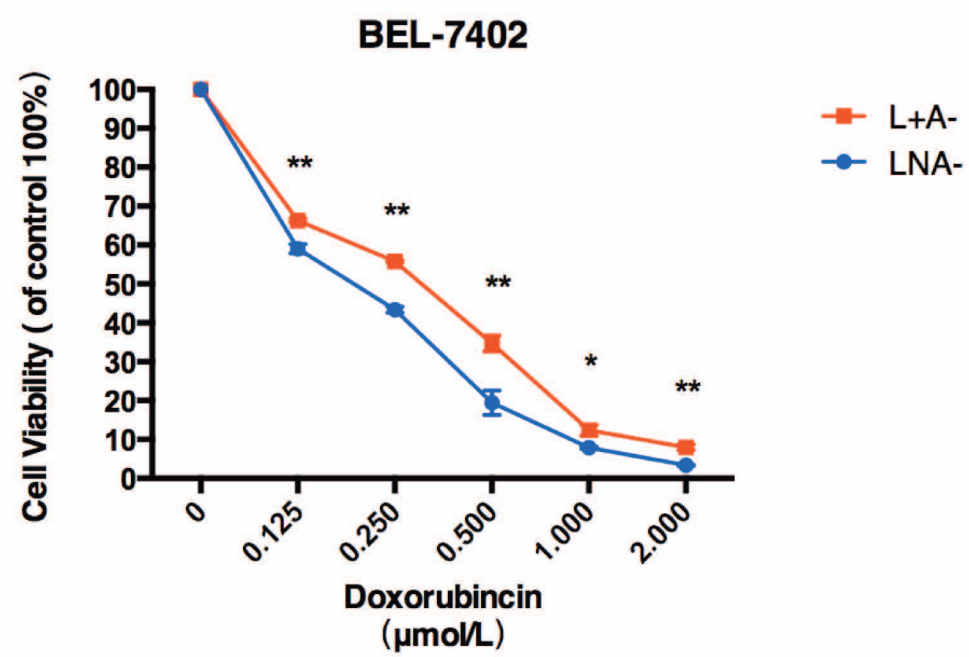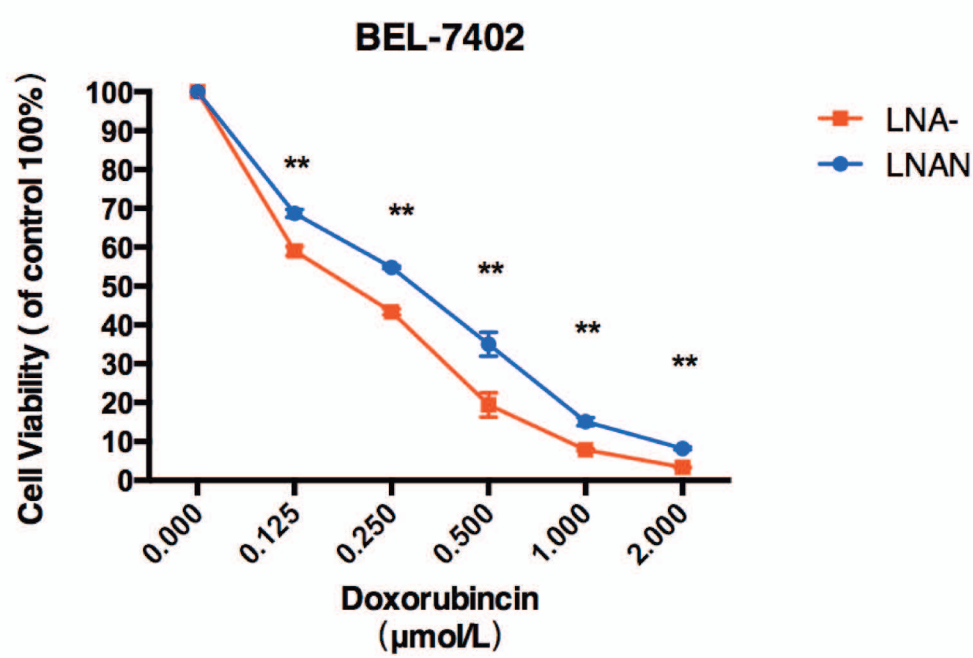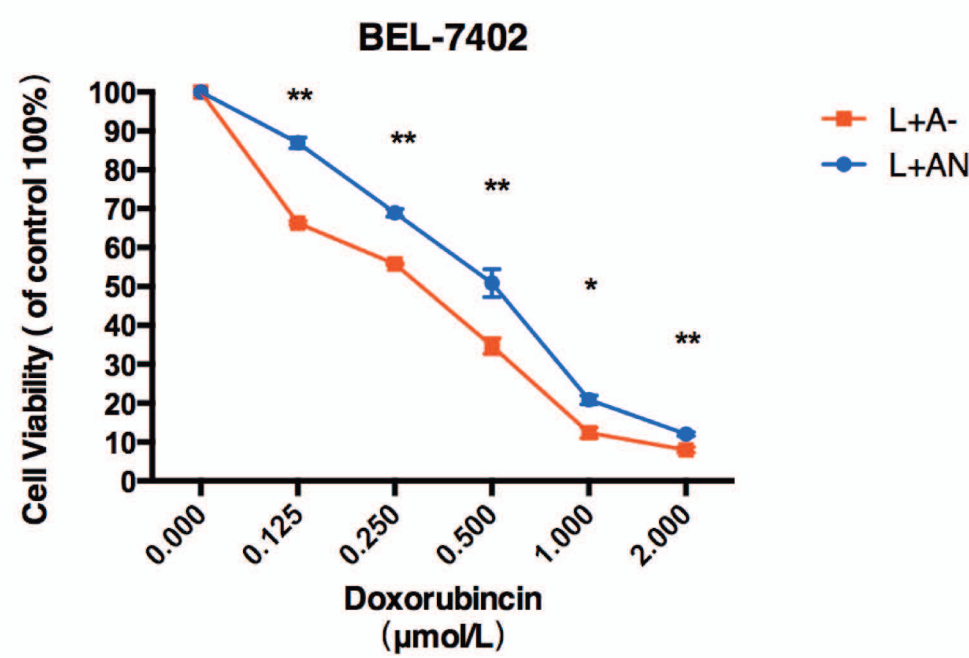

a2

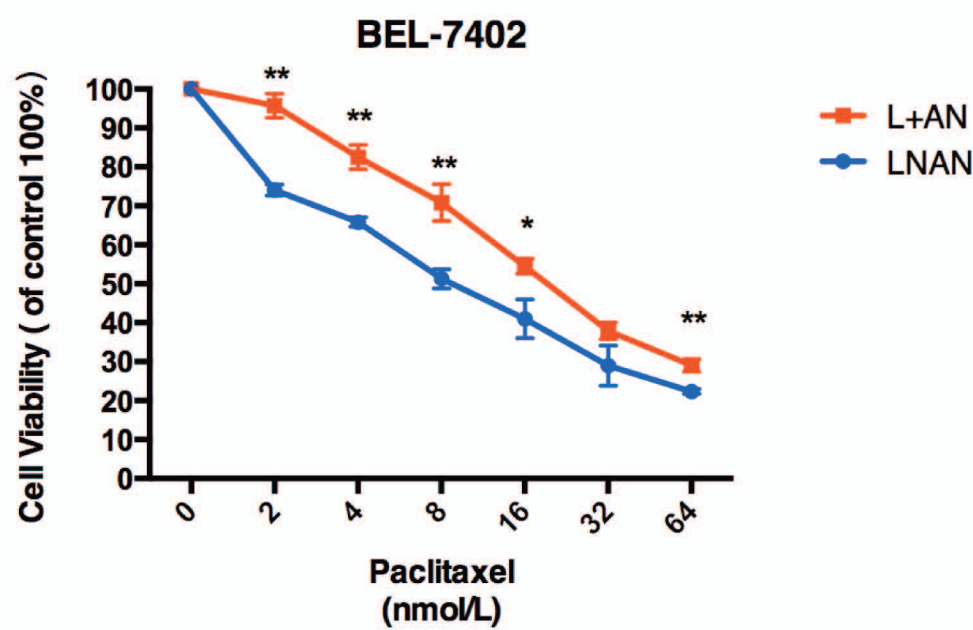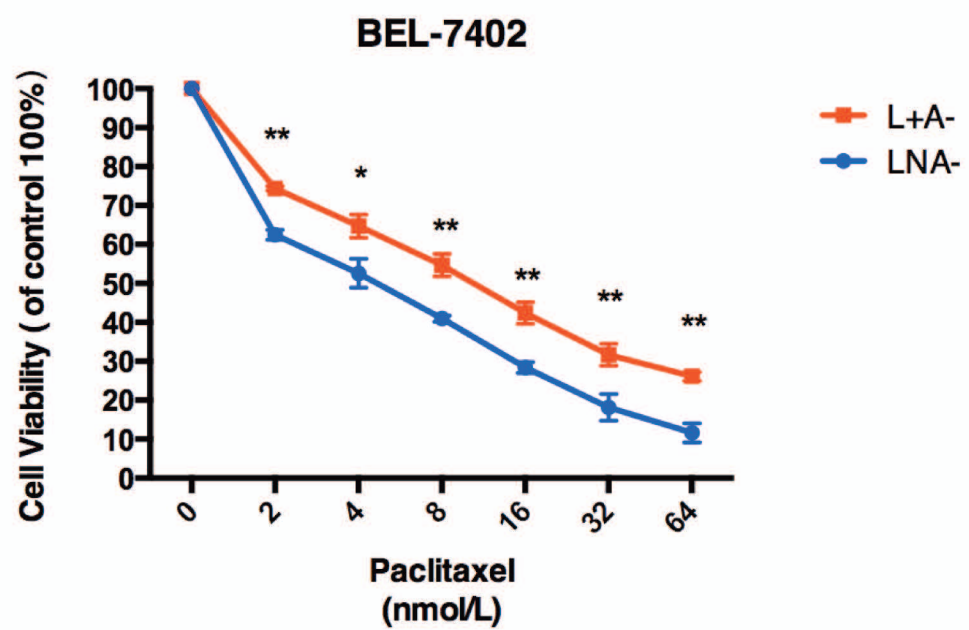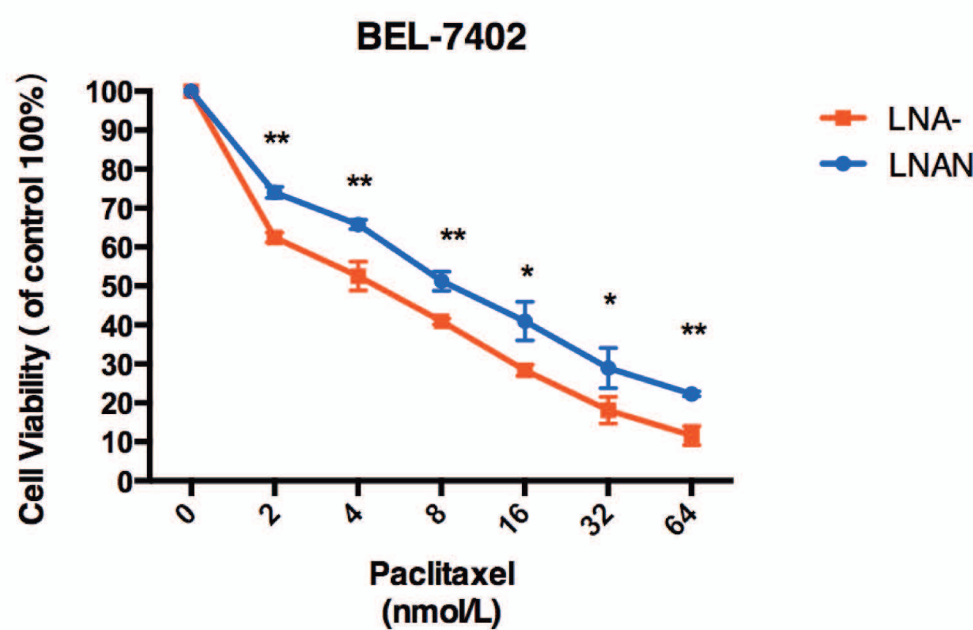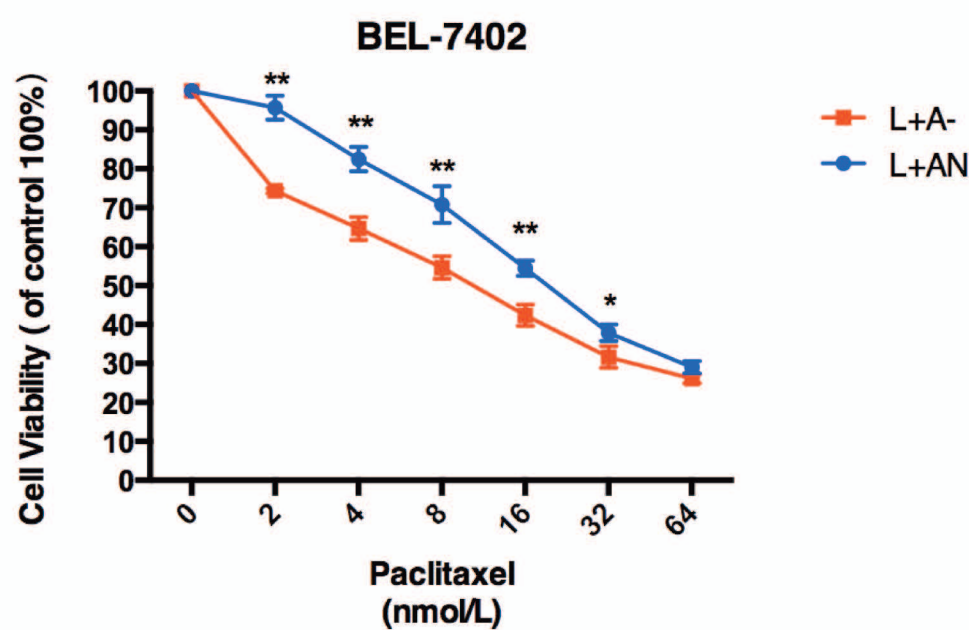

**FigureS4.** AP4 reduce chemotherapy sensitivity via LAPTM4B. **(a)** Viability curves of cells in the presence of various anticancer chemotherapeutic drugs. The LNAN BEL-7402, L+AN BEL-7402, LNA- BEL-7402, L+A-BEL-7402 cells were exposed to increasing concentrations of doxorubicin **(a1)** or paclitaxel **(a2)** respectively, for 48 h. Cell viabilities were determined by cell viability assay as described in materials and methods. Results were expressed as a mean±s.d. of viable cell percentage in triplicates from three independent experiments. (\*P<0.05; \*\*P<0.01, Student' *t*-test).



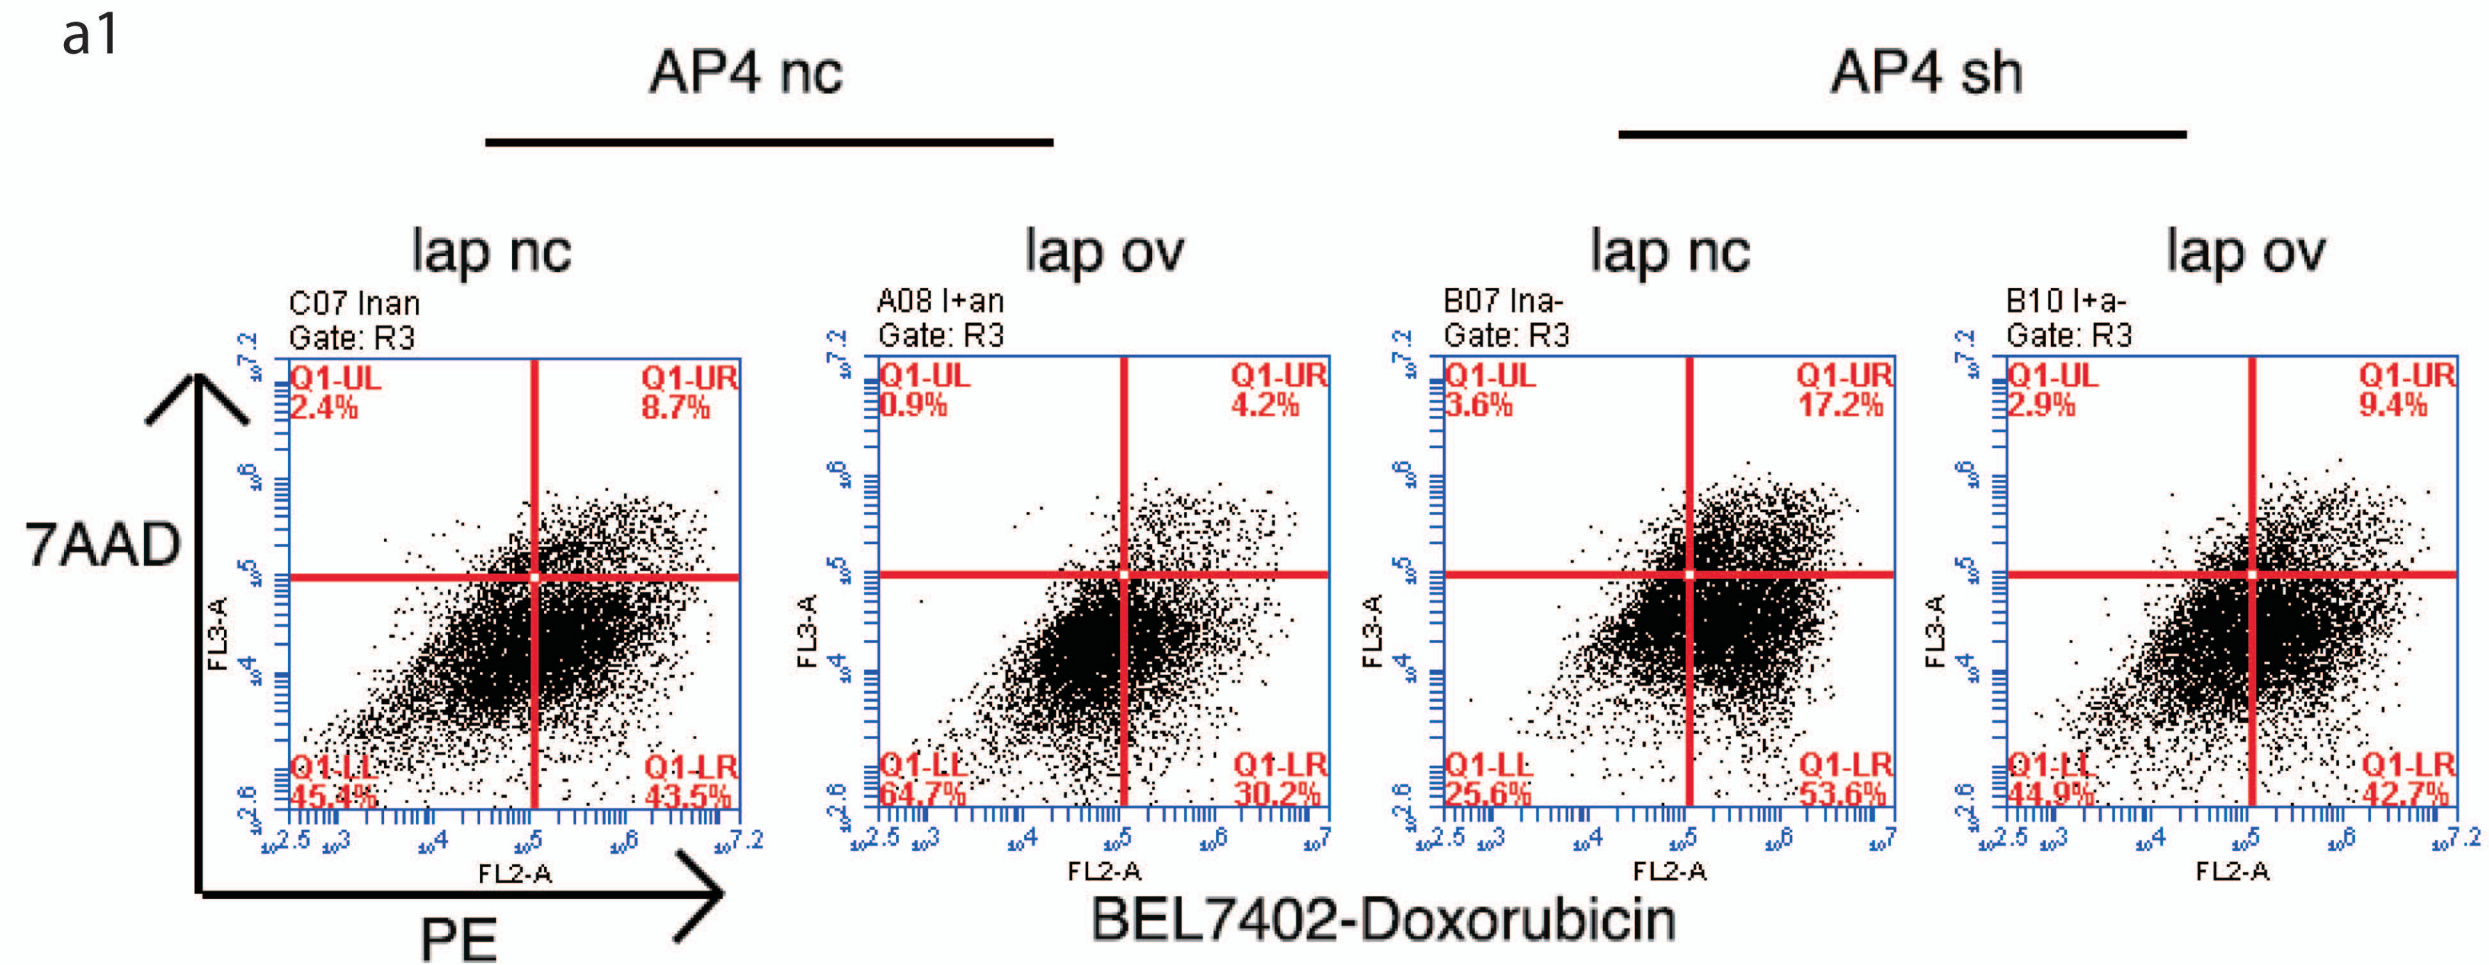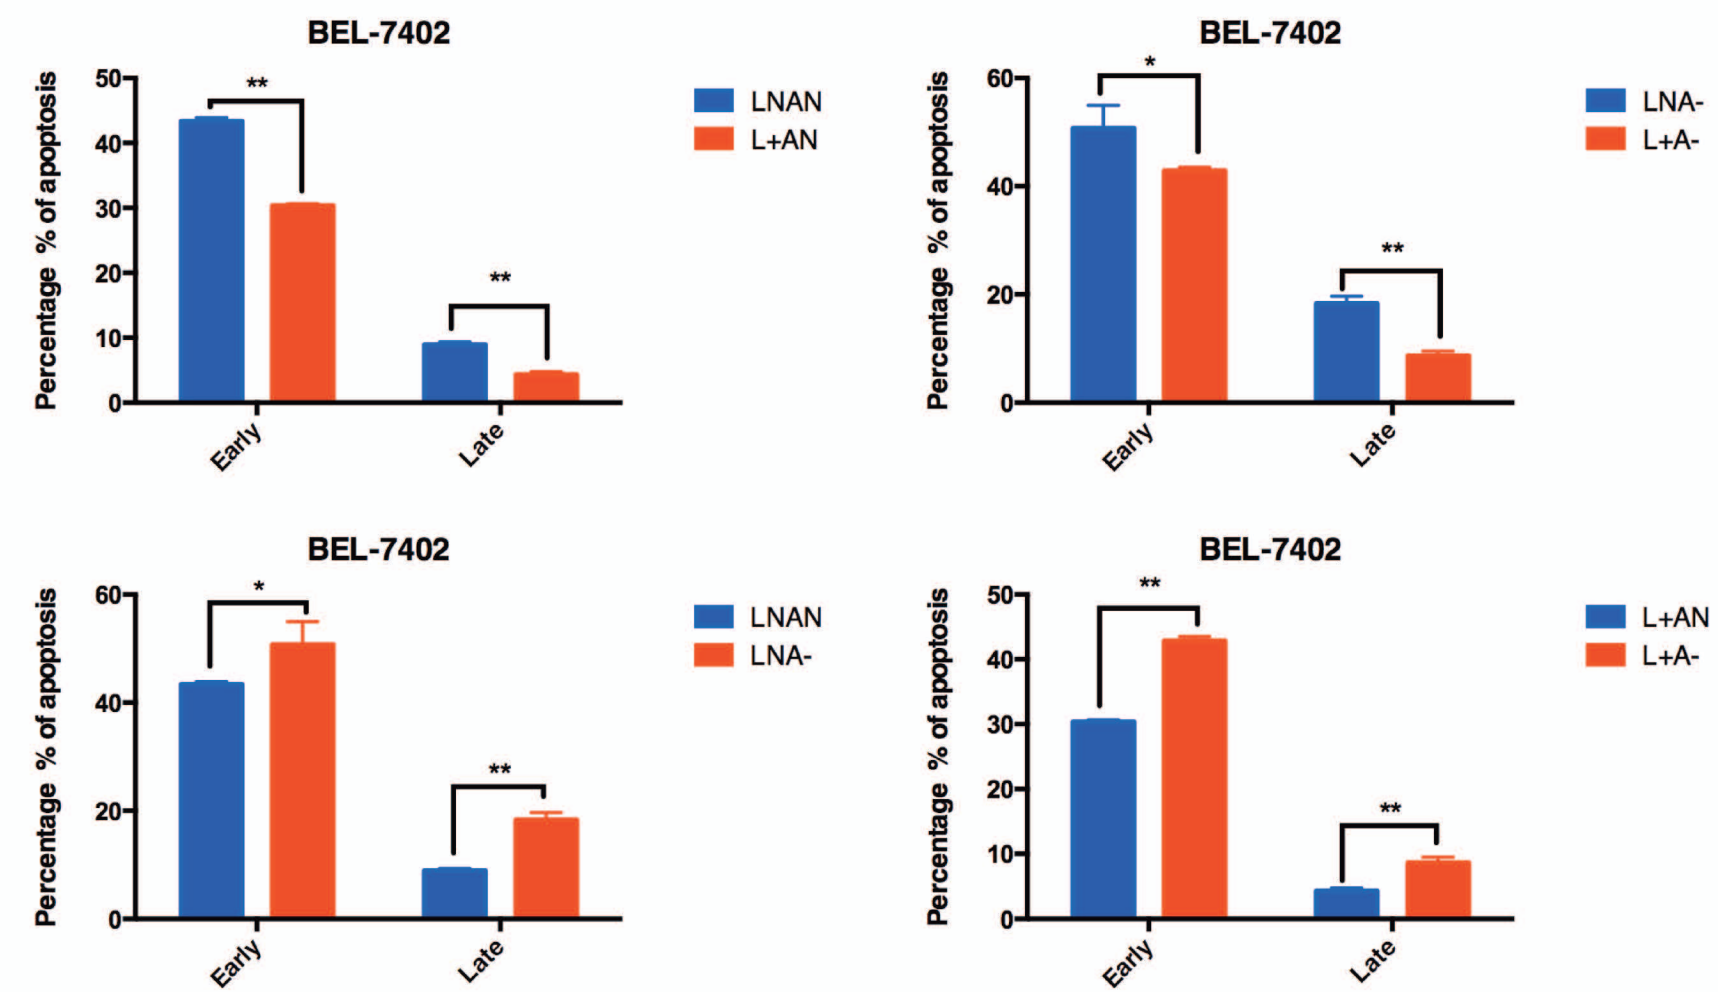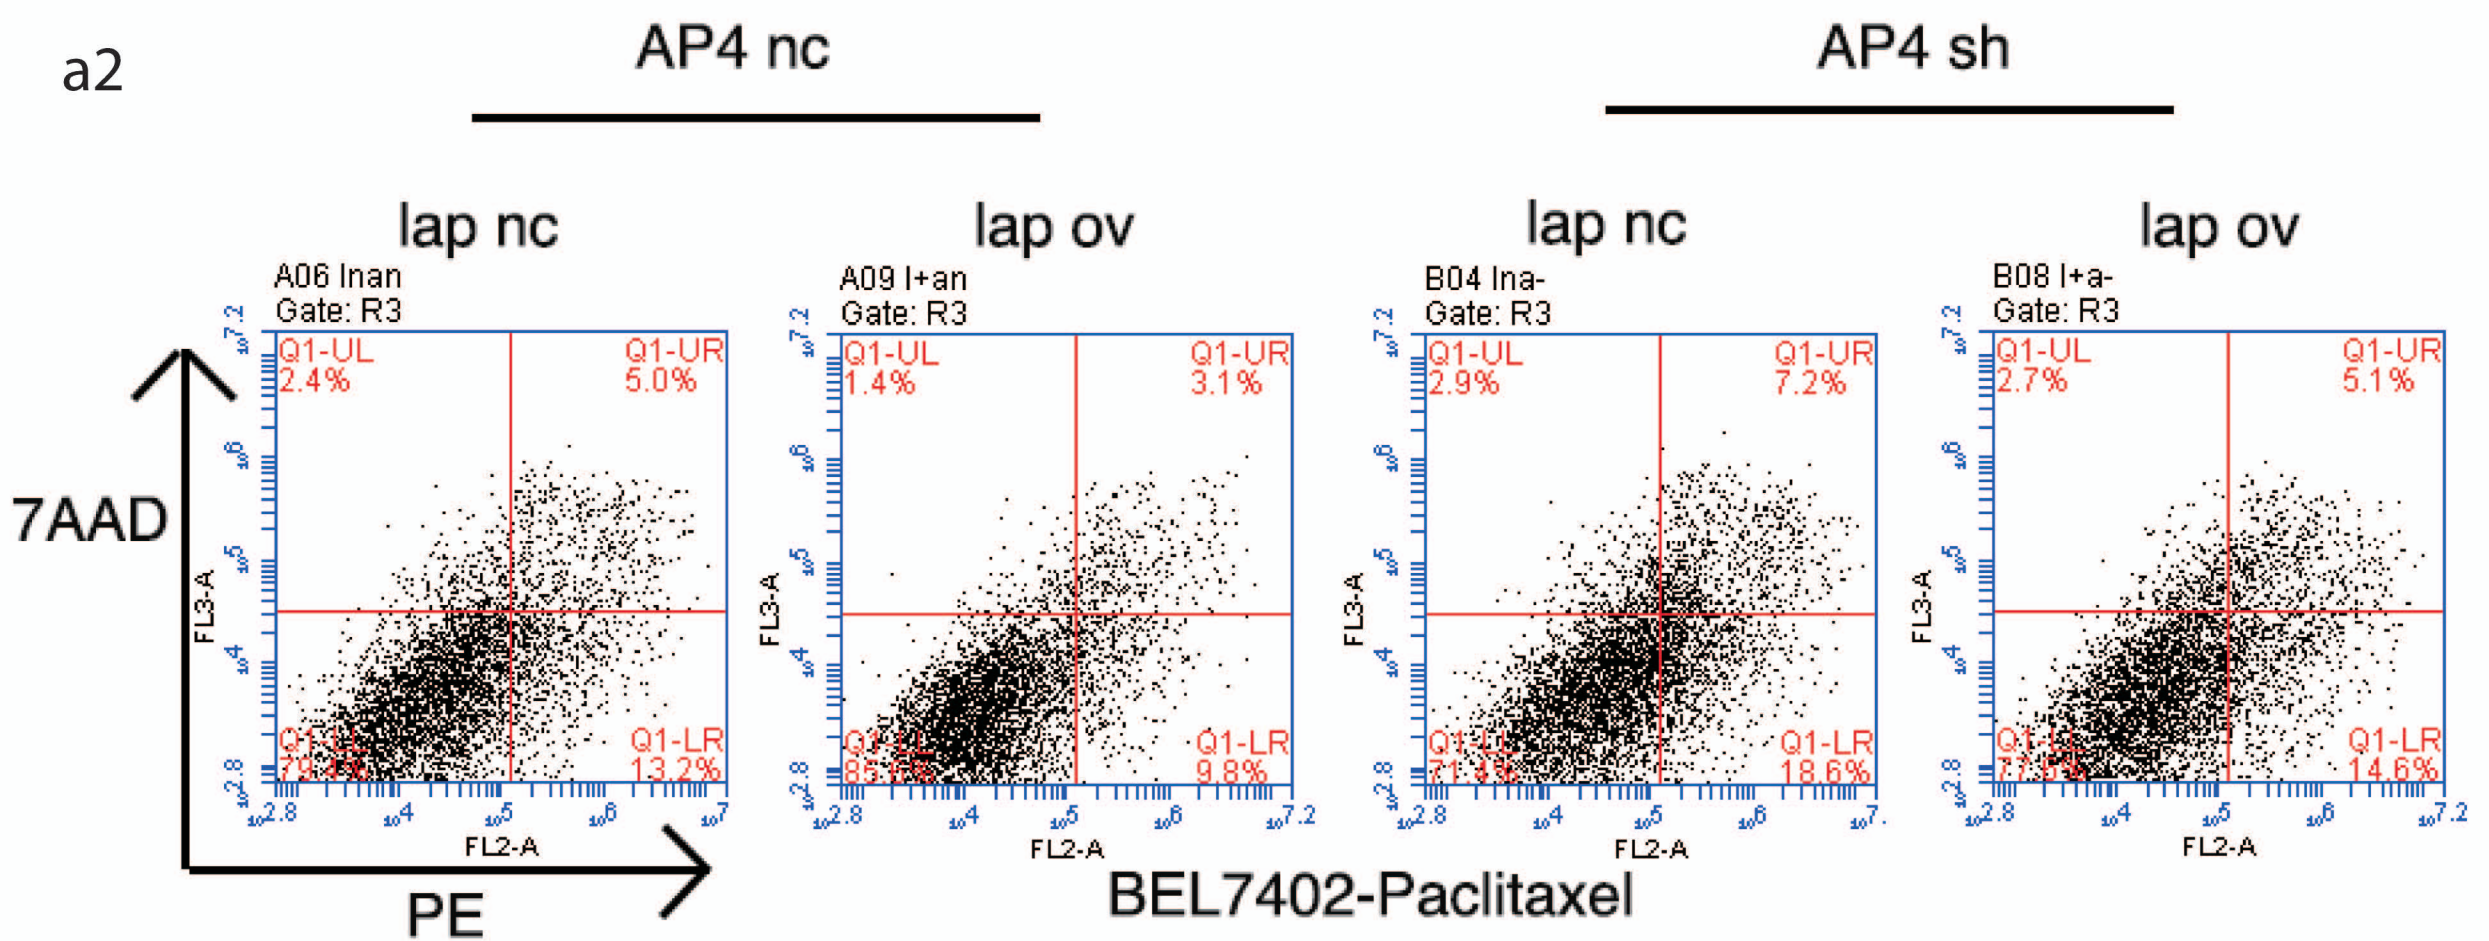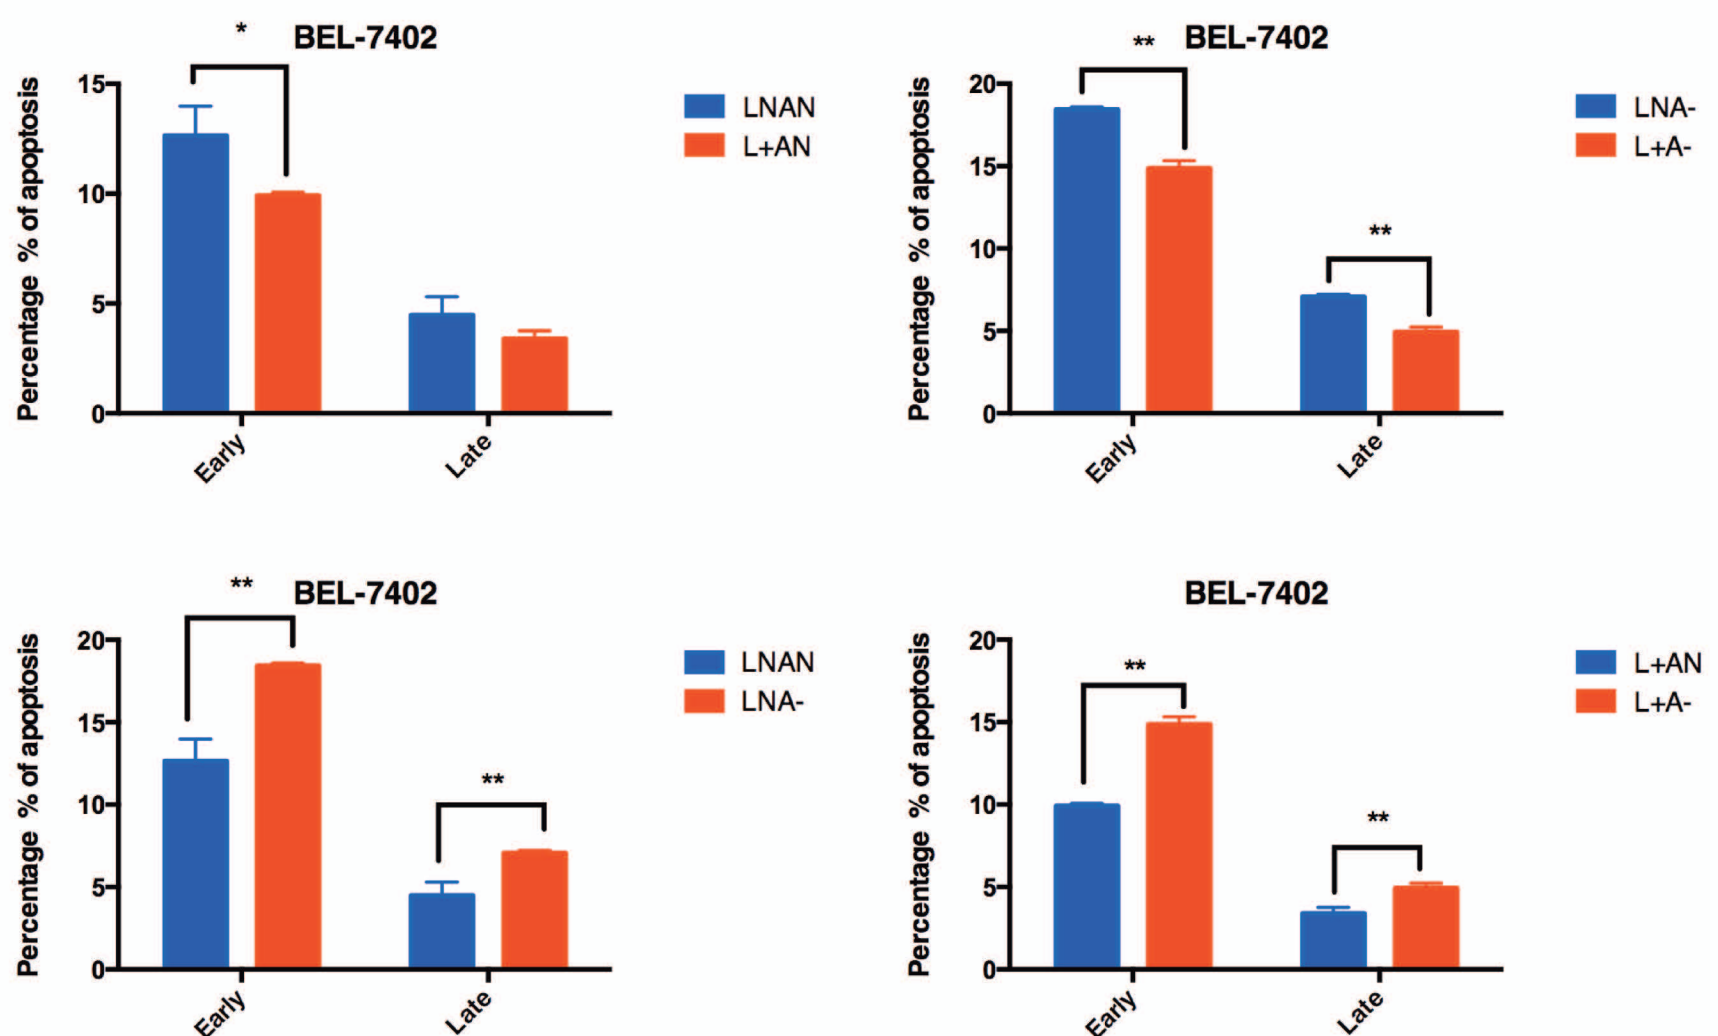

**FigureS5 (a)** Flow cytometry analysis of apoptosis by APC and 7AAD staining. The LNAN BEL-7402, L+AN BEL-7402, LNA- BEL-7402, L+A- BEL-7402 cells were incubated with 0.25 $\mu$ mol/l doxorubicin (**a1**), 8 nmol/l paclitaxel (**a2**) After 48 h incubation, the cells were harvested and analyzed by flow cytometer. Column diagrams of apoptotic cells in percentage. (\*P<0.05; \*\*P<0.01).

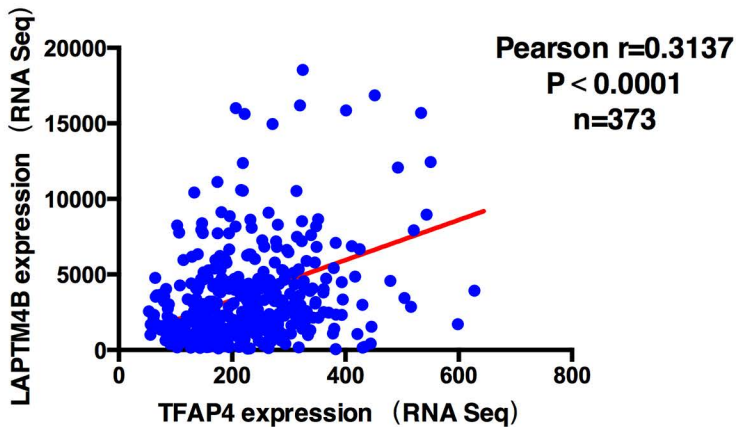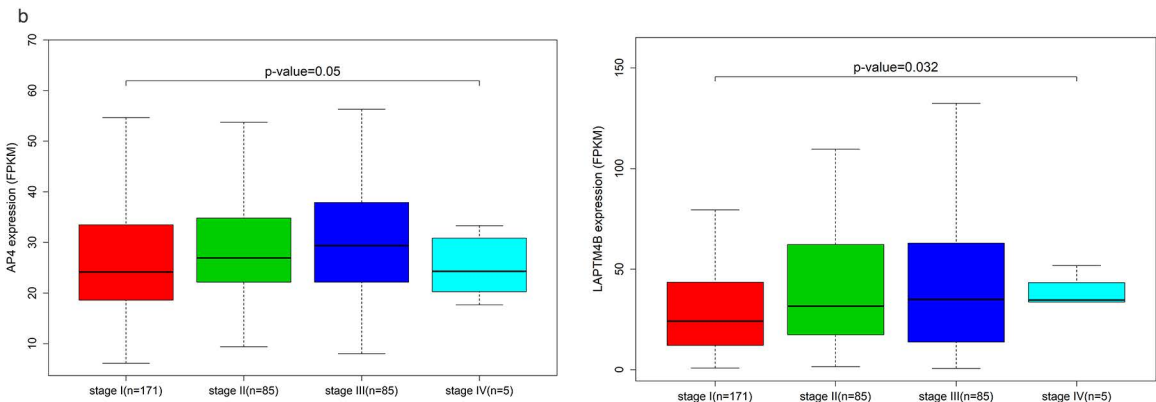

**AP4(p=0.564)**

**LAPTM4B(p=3.464e-05)**

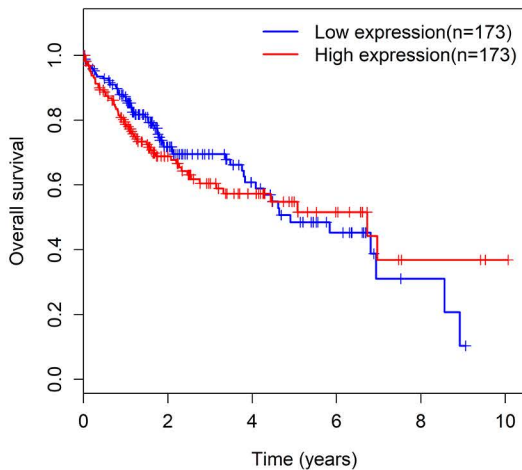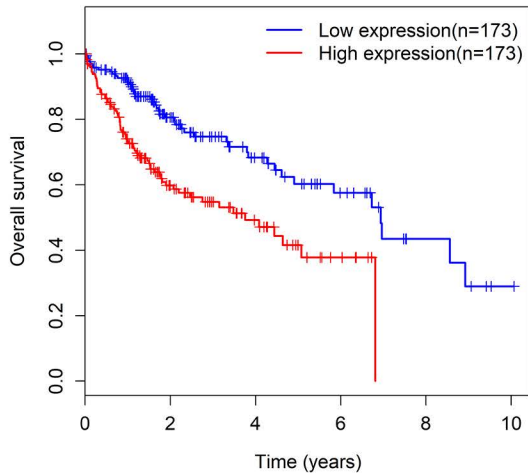

**FigureS6.** TCGA dataset information about 373 HCC patients. **(a)** AP4 mRNA expression significantly correlated with LAPTM4B mRNA expression in 373 hepatoma cell carcinoma patients from TCGA. **(b-c)** The association of AP4 and LAPTM4B with tumour grades and HCC patients' survival.

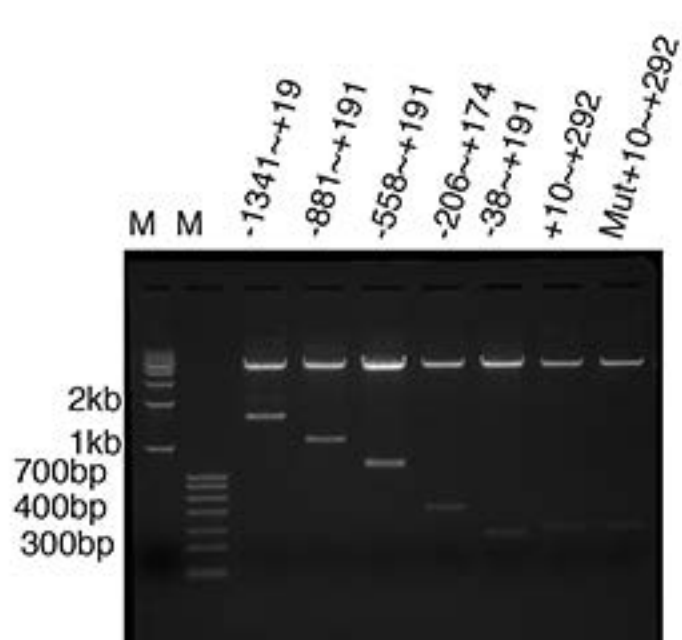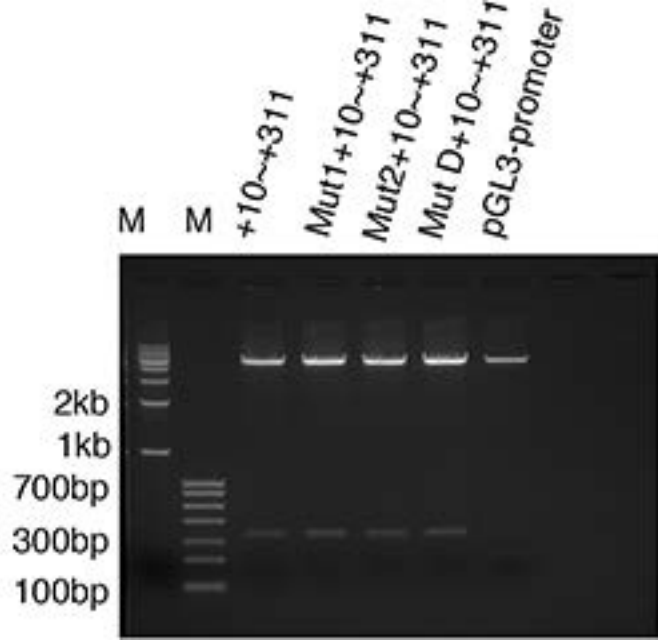

**FigureS7.** All the plasmids digested by Xho1 and Hind3 enzyme. Mut+10~+292 represents the LPTM4B allele\*1 promoter plasmid mutated the AP4 binding site. Mut1+10~+311 represents the LPTM4B allele\*2 promoter plasmid mutated the first AP4 binding site. Mut2+10~+311 represents the LPTM4B allele\*2 promoter plasmid mutated the second AP4 binding site. Mut D+10~+311 represents the LPTM4B allele\*2 promoter plasmid mutated both AP4 binding sites.



a.

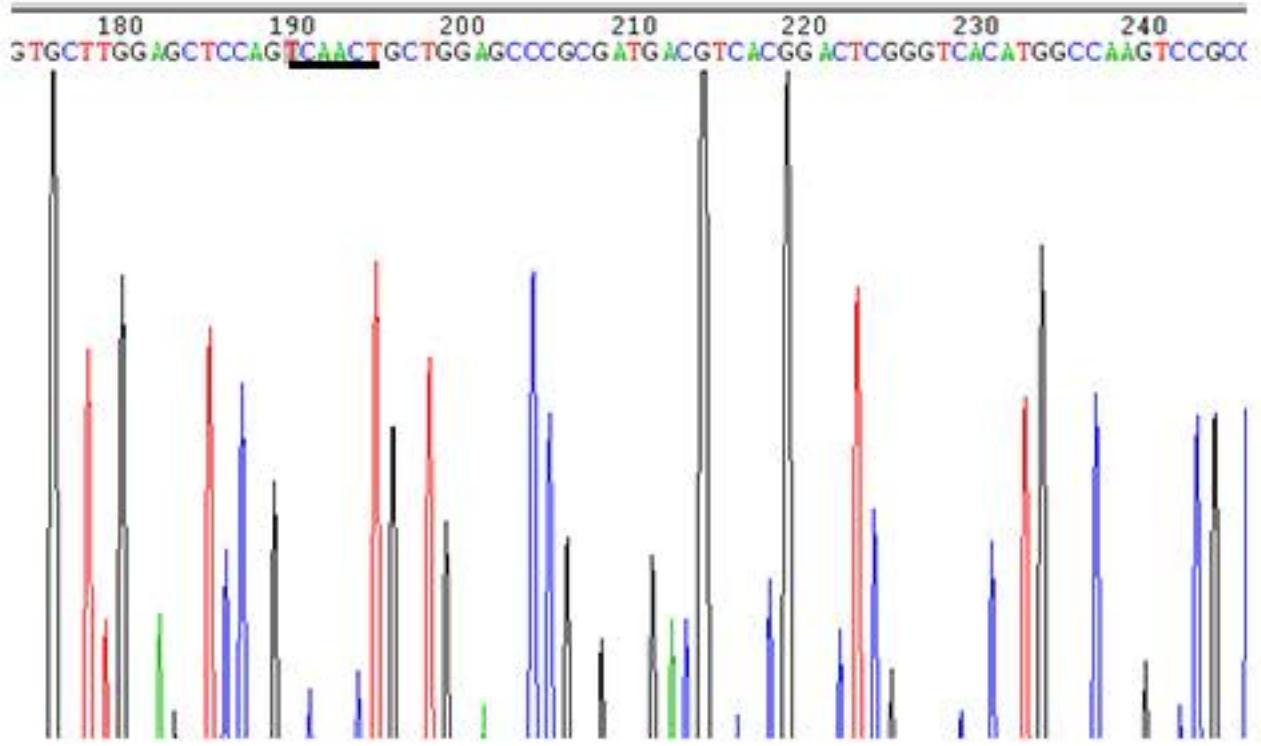

b.

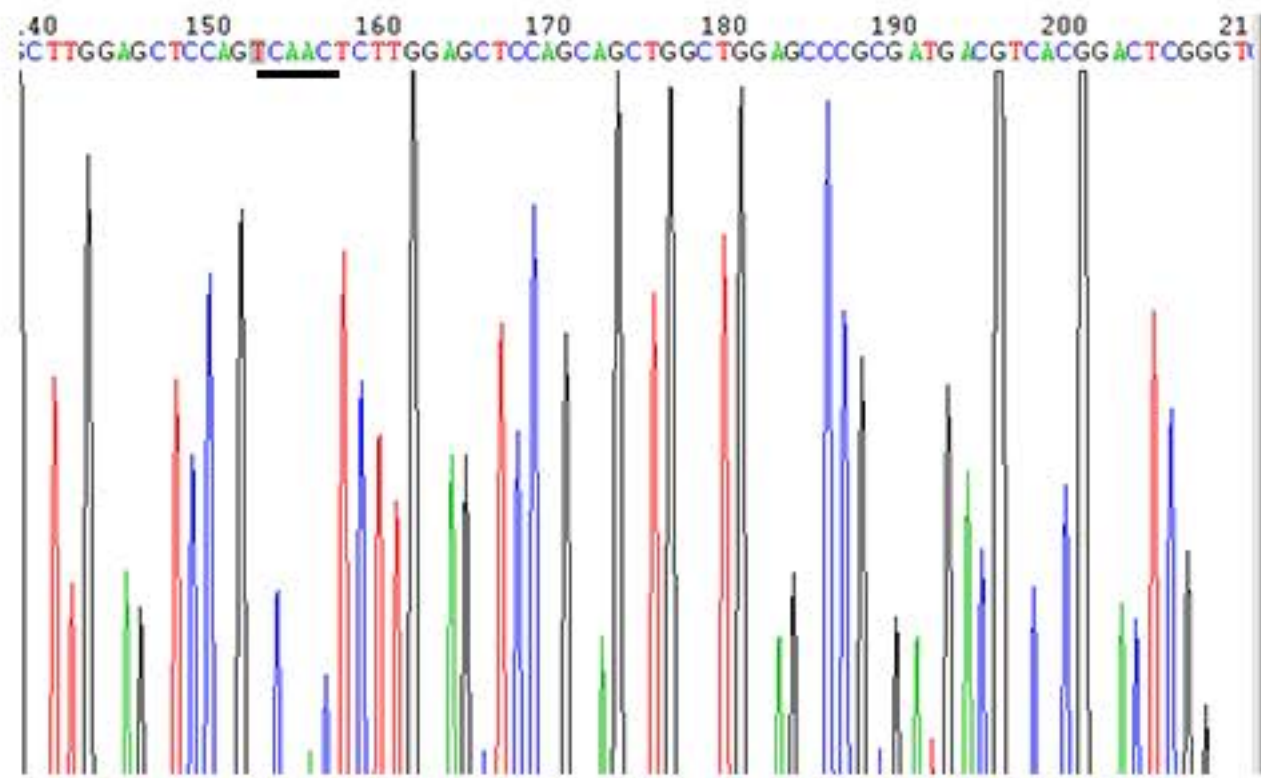

c.

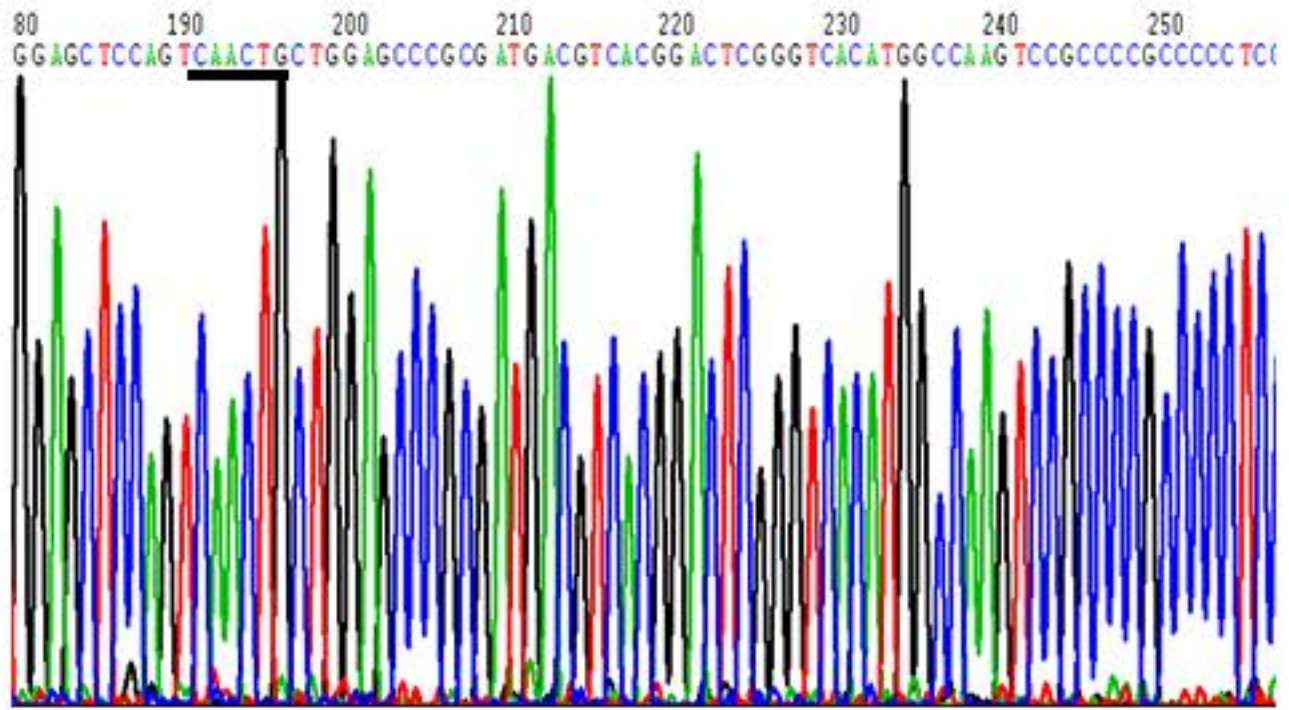

d.

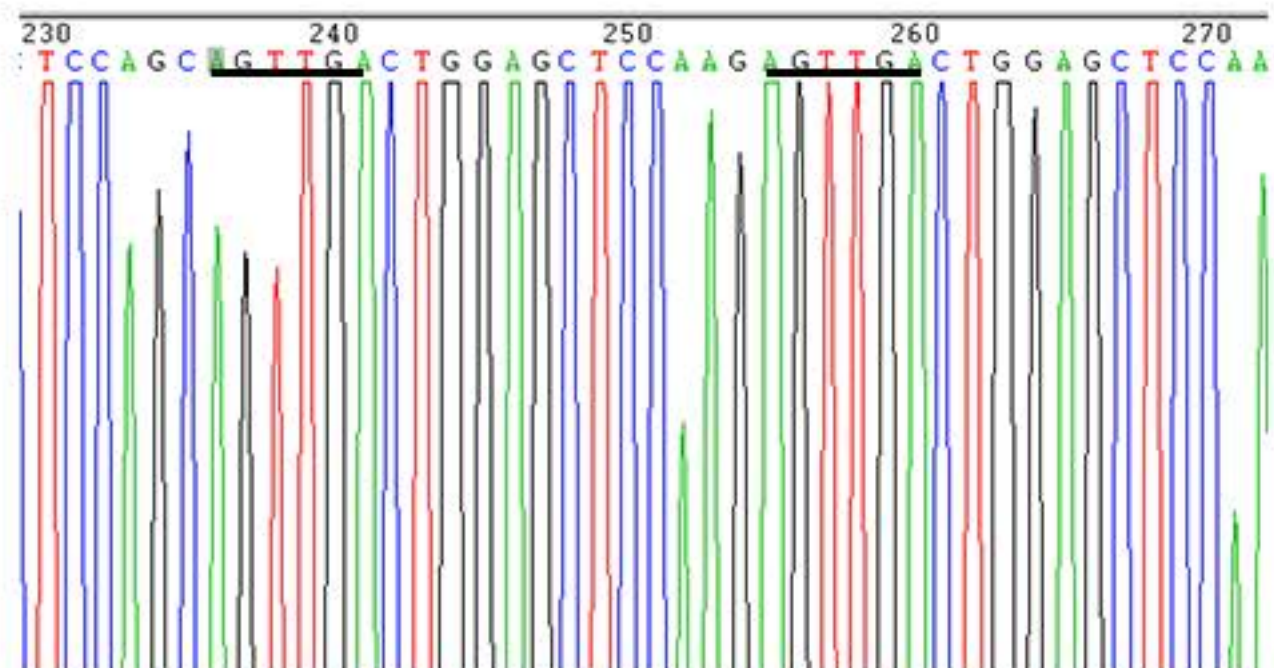

**Figure S8.** The sequenced results of mutation plasmids. TCAACT with underline were mutation sequence in **(a)** Mut +10-+292 plasmid, **(b)** Mut1 +10-+311 plasmid, **(c)** Mut2 +10-+311 plasmid and **(d)** Mut D +10-+311 plasmid.



**FigureS9.** Eleven kinds of plasmids transfected into cells.
