# Supplementary material for: AP4 positively regulates LAPTM4B to promote hepatocellular carcinoma growth and metastasis, while reducing chemotherapy sensitivity
Source: PubMed Central journal article supplement (PMC5830630; doi:10.1002/1878-0261.12171), 2018-02-06
Supplement: MOL2-12-373-s002.pdf [file MOL2-12-373-s002.pdf]

Table S1. LAPTM4B\*1 allele transcription factor prediction results of online database

| Sequence name    | Factor name      | Start position | End position | Dissimilarity | String       | RE equally | RE query |
|------------------|------------------|----------------|--------------|---------------|--------------|------------|----------|
| LAPTM4B*1 allele | VDR [T00885]     | 1              | 4            | 0             | GGGT         | 1.95703    | 2.66244  |
| LAPTM4B*1 allele | VDR [T00885]     | 64             | 67           | 0             | ACCC         | 1.95703    | 2.66244  |
| LAPTM4B*1 allele | VDR [T00885]     | 208            | 211          | 0             | ACCC         | 1.95703    | 2.66244  |
| LAPTM4B*1 allele | VDR [T00885]     | 292            | 295          | 0             | GGGT         | 1.95703    | 2.66244  |
| LAPTM4B*1 allele | VDR [T00885]     | 319            | 322          | 0             | GGGT         | 1.95703    | 2.66244  |
| LAPTM4B*1 allele | VDR [T00885]     | 372            | 375          | 0             | GGGT         | 1.95703    | 2.66244  |
| LAPTM4B*1 allele | VDR [T00885]     | 442            | 445          | 0             | GGGT         | 1.95703    | 2.66244  |
| LAPTM4B*1 allele | VDR [T00885]     | 450            | 453          | 0             | ACCC         | 1.95703    | 2.66244  |
| LAPTM4B*1 allele | VDR [T00885]     | 475            | 478          | 0             | GGGT         | 1.95703    | 2.66244  |
| LAPTM4B*1 allele | WT1 I [T01840]   | 3              | 9            | 5.136498      | GTGTGGT      | 0.18347    | 0.26637  |
| LAPTM4B*1 allele | WT1 I [T01840]   | 85             | 91           | 8.128015      | GTGAGCC      | 0.18347    | 0.27552  |
| LAPTM4B*1 allele | WT1 I [T01840]   | 311            | 317          | 7.513446      | TACTCAC      | 0.09174    | 0.09901  |
| LAPTM4B*1 allele | ENKTF-1 [T00255] | 9              | 16           | 13.885529     | TGGCAAGC     | 0.27521    | 0.38844  |
| LAPTM4B*1 allele | ENKTF-1 [T00255] | 96             | 103          | 6.942764      | TCGCGCCA     | 0.36694    | 0.56658  |
| LAPTM4B*1 allele | ENKTF-1 [T00255] | 229            | 236          | 12.629773     | AACGGCCA     | 0.55042    | 0.66373  |
| LAPTM4B*1 allele | ENKTF-1 [T00255] | 285            | 292          | 1.255756      | TGGCGGAG     | 0.06116    | 0.12299  |
| LAPTM4B*1 allele | ENKTF-1 [T00255] | 341            | 348          | 13.885529     | TGGCTGGA     | 0.27521    | 0.38844  |
| LAPTM4B*1 allele | ENKTF-1 [T00255] | 378            | 385          | 6.942764      | CATGGCCA     | 0.36694    | 0.56658  |
| LAPTM4B*1 allele | ENKTF-1 [T00255] | 380            | 387          | 6.942764      | TGGCCAAG     | 0.36694    | 0.56658  |
| LAPTM4B*1 allele | p300 [T01427]    | 23             | 27           | 1.540766      | AATCC        | 0.48926    | 0.31279  |
| LAPTM4B*1 allele | p300 [T01427]    | 50             | 54           | 3.482089      | GGAGA        | 0.97852    | 1.62404  |
| LAPTM4B*1 allele | p300 [T01427]    | 69             | 73           | 3.482089      | GGAGG        | 0.97852    | 1.62404  |
| LAPTM4B*1 allele | p300 [T01427]    | 75             | 79           | 3.482089      | GGAGG        | 0.97852    | 1.62404  |
| LAPTM4B*1 allele | p300 [T01427]    | 108            | 112          | 0.770383      | ACTCC        | 0.48926    | 0.52181  |
| LAPTM4B*1 allele | p300 [T01427]    | 170            | 174          | 5.408046      | GGAAG        | 0.97852    | 1.11214  |
| LAPTM4B*1 allele | p300 [T01427]    | 185            | 189          | 5.795432      | GGAAC        | 0.48926    | 0.59067  |
| LAPTM4B*1 allele | p300 [T01427]    | 218            | 222          | 0.770383      | GGAGT        | 0.48926    | 0.52181  |
| LAPTM4B*1 allele | p300 [T01427]    | 247            | 251          | 5.408046      | GGAAG        | 0.97852    | 1.11214  |
| LAPTM4B*1 allele | p300 [T01427]    | 256            | 260          | 3.099092      | GGACC        | 0.48926    | 0.8339   |
| LAPTM4B*1 allele | p300 [T01427]    | 259            | 263          | 3.482089      | CTCC         | 0.97852    | 1.62404  |
| LAPTM4B*1 allele | p300 [T01427]    | 281            | 285          | 0             | GGACT        | 0.48926    | 0.50476  |
| LAPTM4B*1 allele | p300 [T01427]    | 289            | 293          | 3.482089      | GGAGG        | 0.97852    | 1.62404  |
| LAPTM4B*1 allele | p300 [T01427]    | 306            | 310          | 1.540766      | GGATT        | 0.48926    | 0.31279  |
| LAPTM4B*1 allele | p300 [T01427]    | 327            | 331          | 3.869475      | GGAGC        | 0.48926    | 0.88508  |
| LAPTM4B*1 allele | p300 [T01427]    | 330            | 334          | 3.869475      | GCTCC        | 0.48926    | 0.88508  |
| LAPTM4B*1 allele | p300 [T01427]    | 346            | 350          | 3.869475      | GGAGC        | 0.48926    | 0.88508  |
| LAPTM4B*1 allele | p300 [T01427]    | 366            | 370          | 0             | GGACT        | 0.48926    | 0.50476  |
| LAPTM4B*1 allele | p300 [T01427]    | 386            | 390          | 0             | AGTCC        | 0.48926    | 0.50476  |
| LAPTM4B*1 allele | p300 [T01427]    | 400            | 404          | 3.482089      | CCTCC        | 0.97852    | 1.62404  |
| LAPTM4B*1 allele | p300 [T01427]    | 406            | 410          | 2.711705      | CGTCC        | 1.46777    | 1.81715  |
| LAPTM4B*1 allele | p300 [T01427]    | 434            | 438          | 3.869475      | GGAGC        | 0.48926    | 0.88508  |
| LAPTM4B*1 allele | p300 [T01427]    | 465            | 469          | 3.869475      | GGAGC        | 0.48926    | 0.88508  |
| LAPTM4B*1 allele | p300 [T01427]    | 484            | 488          | 3.482089      | GGAGG        | 0.97852    | 1.62404  |
| LAPTM4B*1 allele | R2 [T00712]      | 25             | 30           | 14.26934      | TCCCAG       | 1.46777    | 1.68655  |
| LAPTM4B*1 allele | R2 [T00712]      | 47             | 52           | 11.337888     | GCAGGA       | 0.61157    | 0.85803  |
| LAPTM4B*1 allele | R2 [T00712]      | 72             | 77           | 9.512894      | GGCGGA       | 1.83472    | 2.05292  |
| LAPTM4B*1 allele | R2 [T00712]      | 110            | 115          | 1.824994      | TCCAGC       | 0.12231    | 0.15544  |
| LAPTM4B*1 allele | R2 [T00712]      | 167            | 172          | 14.26934      | AAGGGA       | 1.46777    | 1.68655  |
| LAPTM4B*1 allele | R2 [T00712]      | 215            | 220          | 9.512894      | AATGGA       | 1.83472    | 2.05292  |
| LAPTM4B*1 allele | R2 [T00712]      | 244            | 249          | 9.512894      | GAAGGA       | 1.83472    | 2.05292  |
| LAPTM4B*1 allele | R2 [T00712]      | 261            | 266          | 9.512894      | TCCACT       | 1.83472    | 2.05292  |
| LAPTM4B*1 allele | R2 [T00712]      | 278            | 283          | 14.26934      | AGGGGA       | 1.46777    | 1.68655  |
| LAPTM4B*1 allele | R2 [T00712]      | 286            | 291          | 9.512894      | GGCGGA       | 1.83472    | 2.05292  |
| LAPTM4B*1 allele | R2 [T00712]      | 303            | 308          | 0             | GATGGA       | 0.36694    | 0.36637  |
| LAPTM4B*1 allele | R2 [T00712]      | 324            | 329          | 9.512894      | CTTGA        | 1.83472    | 2.05292  |
| LAPTM4B*1 allele | R2 [T00712]      | 332            | 337          | 1.824994      | TCCAGC       | 0.12231    | 0.15544  |
| LAPTM4B*1 allele | R2 [T00712]      | 343            | 348          | 1.824994      | GCTGGA       | 0.12231    | 0.15544  |
| LAPTM4B*1 allele | R2 [T00712]      | 388            | 393          | 9.512894      | TCCGCC       | 1.83472    | 2.05292  |
| LAPTM4B*1 allele | R2 [T00712]      | 402            | 407          | 14.26934      | TCCCG        | 1.46777    | 1.68655  |
| LAPTM4B*1 allele | R2 [T00712]      | 408            | 413          | 14.26934      | TCCCG        | 1.46777    | 1.68655  |
| LAPTM4B*1 allele | R2 [T00712]      | 431            | 436          | 14.26934      | TTCGGA       | 1.46777    | 1.68655  |
| LAPTM4B*1 allele | Ik-1 [T02702]    | 25             | 37           | 4.748597      | TCCCAGTACTCG | 0.00078    | 0.00152  |
| LAPTM4B*1 allele | AIRE [T05990]    | 39             | 48           | 10.110876     | TTGGTTGGGC   | 0.04109    | 0.02997  |
| LAPTM4B*1 allele | Elk-1 [T00250]   | 23             | 27           | 6.853012      | AATCC        | 1.46777    | 1.47544  |
| LAPTM4B*1 allele | Elk-1 [T00250]   | 50             | 54           | 7.213232      | GGAGA        | 1.46777    | 1.47544  |
| LAPTM4B*1 allele | Elk-1 [T00250]   | 69             | 73           | 5.092035      | GGAGG        | 0.48926    | 0.96615  |
| LAPTM4B*1 allele | Elk-1 [T00250]   | 75             | 79           | 5.092035      | GGAGG        | 0.48926    | 0.96615  |
| LAPTM4B*1 allele | Elk-1 [T00250]   | 108            | 112          | 7.984576      | ACTCC        | 0.48926    | 0.52181  |
| LAPTM4B*1 allele | Elk-1 [T00250]   | 170            | 174          | 0             | GGAAG        | 0.48926    | 0.65789  |
| LAPTM4B*1 allele | Elk-1 [T00250]   | 185            | 189          | 2.314032      | GGAAC        | 0.48926    | 0.59067  |
| LAPTM4B*1 allele | Elk-1 [T00250]   | 218            | 222          | 7.984576      | GGAGT        | 0.48926    | 0.52181  |
| LAPTM4B*1 allele | Elk-1 [T00250]   | 247            | 251          | 0             | GGAAG        | 0.48926    | 0.65789  |
| LAPTM4B*1 allele | Elk-1 [T00250]   | 256            | 260          | 6.274504      | GGACC        | 0.97852    | 1.33867  |
| LAPTM4B*1 allele | Elk-1 [T00250]   | 259            | 263          | 5.092035      | CCTCC        | 0.48926    | 0.96615  |
| LAPTM4B*1 allele | Elk-1 [T00250]   | 281            | 285          | 6.853012      | GGACT        | 1.46777    | 1.47544  |
| LAPTM4B*1 allele | Elk-1 [T00250]   | 289            | 293          | 5.092035      | GGAGG        | 0.48926    | 0.96615  |
| LAPTM4B*1 allele | Elk-1 [T00250]   | 306            | 310          | 6.853012      | GGATT        | 1.46777    | 1.47544  |
| LAPTM4B*1 allele | Elk-1 [T00250]   | 327            | 331          | 7.406067      | GGAGC        | 0.48926    | 0.88508  |
| LAPTM4B*1 allele | Elk-1 [T00250]   | 330            | 334          | 7.406067      | GCTCC        | 0.48926    | 0.88508  |
| LAPTM4B*1 allele | Elk-1 [T00250]   | 346            | 350          | 7.406067      | GGAGC        | 0.48926    | 0.88508  |
| LAPTM4B*1 allele | Elk-1 [T00250]   | 366            | 370          | 6.853012      | GGACT        | 1.46777    | 1.47544  |
| LAPTM4B*1 allele | Elk-1 [T00250]   | 386            | 390          | 6.853012      | AGTCC        | 1.46777    | 1.47544  |
| LAPTM4B*1 allele | Elk-1 [T00250]   | 400            | 404          | 5.092035      | CCTCC        | 0.48926    | 0.96615  |
| LAPTM4B*1 allele | Elk-1 [T00250]   | 406            | 410          | 3.960472      | CGTCC        | 0.97852    | 1.40689  |
| LAPTM4B*1 allele | Elk-1 [T00250]   | 434            | 438          | 7.406067      | GGAGC        | 0.48926    | 0.88508  |
| LAPTM4B*1 allele | Elk-1 [T00250]   | 465            | 469          | 7.406067      | GGAGC        | 0.48926    | 0.88508  |

|                  |                       |     |     |           |              |         |         |
|------------------|-----------------------|-----|-----|-----------|--------------|---------|---------|
| LAPTM4B*1 allele | Elk-1 [T00250]        | 484 | 488 | 5.092035  | GGAGG        | 0.48926 | 0.96615 |
| LAPTM4B*1 allele | β-beta:RXR-α [T00250] | 56  | 67  | 12.463326 | TCGCTTGAACCC | 0.03279 | 0.06694 |
| LAPTM4B*1 allele | Nkx2-1 [T00857]       | 67  | 73  | 1.361249  | CGGGAGG      | 0.09174 | 0.23205 |
| LAPTM4B*1 allele | Nkx2-1 [T00857]       | 73  | 79  | 4.033796  | GCCGAGG      | 0.21405 | 0.33738 |
| LAPTM4B*1 allele | Nkx2-1 [T00857]       | 259 | 265 | 2.672547  | CCTCCAC      | 0.03058 | 0.05146 |
| LAPTM4B*1 allele | Nkx2-1 [T00857]       | 287 | 293 | 4.033796  | GCCGAGG      | 0.21405 | 0.33738 |
| LAPTM4B*1 allele | Nkx2-1 [T00857]       | 400 | 406 | 4.033796  | CCTCCAC      | 0.21405 | 0.33738 |
| LAPTM4B*1 allele | Nkx2-1 [T00857]       | 479 | 485 | 4.912497  | ATCGAGG      | 0.4281  | 0.44062 |
| LAPTM4B*1 allele | Nkx2-1 [T00857]       | 482 | 488 | 4.033796  | GAGGAGG      | 0.21405 | 0.33738 |
| LAPTM4B*1 allele | AP-2α [T00035]        | 17  | 22  | 1.437215  | GCCTGT       | 0.12231 | 0.17171 |
| LAPTM4B*1 allele | AP-2α [T00035]        | 69  | 74  | 2.003202  | GGAGGC       | 0.24463 | 0.54059 |
| LAPTM4B*1 allele | AP-2α [T00035]        | 114 | 119 | 0.159691  | GCCTGG       | 0.24463 | 0.50933 |
| LAPTM4B*1 allele | AP-2α [T00035]        | 248 | 253 | 3.004803  | GAAGGC       | 0.36694 | 0.51621 |
| LAPTM4B*1 allele | AP-2α [T00035]        | 428 | 433 | 3.004803  | GCCTTC       | 0.36694 | 0.51621 |
| LAPTM4B*1 allele | AP-2α [T00035]        | 484 | 489 | 2.003202  | GGAGGC       | 0.24463 | 0.54059 |
| LAPTM4B*1 allele | AP-2α [T00035]        | 488 | 493 | 0         | GCAGGC       | 0.24463 | 0.50933 |
| LAPTM4B*1 allele | Sp1 [T00759]          | 69  | 77  | 9.532578  | GGAGGCGGA    | 0.0516  | 0.15696 |
| LAPTM4B*1 allele | Sp1 [T00759]          | 283 | 291 | 11.706922 | ACTGGCGGA    | 0.04205 | 0.08604 |
| LAPTM4B*1 allele | Sp1 [T00759]          | 388 | 396 | 2.421386  | TCCGCCCGG    | 0.02102 | 0.08184 |
| LAPTM4B*1 allele | Sp1 [T00759]          | 393 | 401 | 0         | CCCGCCCCC    | 0.00764 | 0.04235 |
| LAPTM4B*1 allele | Sp1 [T00759]          | 410 | 418 | 8.565378  | CCCGCCGCT    | 0.0344  | 0.11197 |
| LAPTM4B*1 allele | C/EBPα [T00108]       | 9   | 14  | 3.200469  | TGGCAA       | 0.73389 | 0.79063 |
| LAPTM4B*1 allele | C/EBPα [T00108]       | 80  | 85  | 0.527529  | TTGCAG       | 0.24463 | 0.15503 |
| LAPTM4B*1 allele | C/EBPα [T00108]       | 104 | 109 | 0         | TTGCAC       | 0.24463 | 0.16663 |
| LAPTM4B*1 allele | C/EBPα [T00108]       | 179 | 184 | 3.022085  | TCGCAA       | 0.73389 | 0.79063 |
| LAPTM4B*1 allele | C/EBPβ [T00581]       | 8   | 14  | 4.807336  | GTGGCAA      | 0.24463 | 0.20486 |
| LAPTM4B*1 allele | C/EBPβ [T00581]       | 80  | 86  | 4.329855  | TTGCAGT      | 0.21405 | 0.15729 |
| LAPTM4B*1 allele | C/EBPβ [T00581]       | 104 | 110 | 0.805985  | TTGCAC       | 0.09174 | 0.07372 |
| LAPTM4B*1 allele | C/EBPβ [T00581]       | 178 | 184 | 4.807336  | ATCGCAA      | 0.24463 | 0.20486 |
| LAPTM4B*1 allele | E2F-1:DP-1 [T05204]   | 95  | 103 | 2.513294  | ATCGCGCCA    | 0.00573 | 0.01062 |
| LAPTM4B*1 allele | E2F-1:DP-1 [T05204]   | 285 | 293 | 14.802692 | TGGCGGAGG    | 0.03058 | 0.07522 |
| LAPTM4B*1 allele | E2F-1:DP-1 [T05204]   | 391 | 399 | 12.662304 | GCCCCGCC     | 0.07262 | 0.20589 |
| LAPTM4B*1 allele | E2F-1:DP-1 [T05204]   | 408 | 416 | 10.023625 | TCCCCCGCG    | 0.04396 | 0.11207 |
| LAPTM4B*1 allele | CUTL1 [T00100]        | 103 | 108 | 2.06853   | ATTGCA       | 0.73389 | 0.4205  |
| LAPTM4B*1 allele | BTEB3 [T05051]        | 71  | 79  | 3.496398  | AGGCGGAGG    | 0.01911 | 0.03439 |
| LAPTM4B*1 allele | BTEB3 [T05051]        | 108 | 116 | 14.933149 | ACTCCAGCC    | 0.06116 | 0.09755 |
| LAPTM4B*1 allele | BTEB3 [T05051]        | 214 | 222 | 12.17827  | GAATGGAGT    | 0.08791 | 0.13551 |
| LAPTM4B*1 allele | BTEB3 [T05051]        | 259 | 267 | 7.847399  | CCTCCACTC    | 0.05733 | 0.11349 |
| LAPTM4B*1 allele | BTEB3 [T05051]        | 285 | 293 | 11.761034 | TGGCGGAGG    | 0.08791 | 0.13551 |
| LAPTM4B*1 allele | BTEB3 [T05051]        | 400 | 408 | 5.813911  | CCTCCCCGT    | 0.01147 | 0.01611 |
| LAPTM4B*1 allele | E47 [T00207]          | 26  | 32  | 4.682492  | CCAGCT       | 0.24463 | 0.35632 |
| LAPTM4B*1 allele | E47 [T00207]          | 110 | 116 | 4.327662  | TCCAGCC      | 0.24463 | 0.35632 |
| LAPTM4B*1 allele | E47 [T00207]          | 114 | 120 | 5.305872  | GCCTGGG      | 0.21405 | 0.30154 |
| LAPTM4B*1 allele | E47 [T00207]          | 233 | 239 | 0         | GCCAGAT      | 0.06116 | 0.08    |
| LAPTM4B*1 allele | E47 [T00207]          | 282 | 288 | 4.485315  | GACTTGGC     | 0.24463 | 0.35632 |
| LAPTM4B*1 allele | E47 [T00207]          | 332 | 338 | 5.510905  | TCCAGCA      | 0.21405 | 0.30154 |
| LAPTM4B*1 allele | E47 [T00207]          | 338 | 344 | 3.634763  | AGCTGGC      | 0.03058 | 0.04668 |
| LAPTM4B*1 allele | E47 [T00207]          | 342 | 348 | 4.327662  | GGCTTGA      | 0.24463 | 0.35632 |
| LAPTM4B*1 allele | SRY [T00997]          | 121 | 127 | 6.723683  | CGACAAG      | 0.24463 | 0.2844  |
| LAPTM4B*1 allele | MBF1 [T00492]         | 141 | 151 | 14.636473 | CTCAAAAAAAAA | 0.05805 | 0.0185  |
| LAPTM4B*1 allele | MBF1 [T00492]         | 192 | 202 | 14.636473 | GACTAAAAAGAA | 0.05805 | 0.0185  |
| LAPTM4B*1 allele | STAT5A [T04683]       | 170 | 173 | 0         | GGAA         | 1.95703 | 2.04421 |
| LAPTM4B*1 allele | STAT5A [T04683]       | 185 | 188 | 0         | GGAA         | 1.95703 | 2.04421 |
| LAPTM4B*1 allele | STAT5A [T04683]       | 247 | 250 | 0         | GGAA         | 1.95703 | 2.04421 |
| LAPTM4B*1 allele | POU3F2 [T00630]       | 176 | 182 | 9.725533  | AAATCGC      | 0.06116 | 0.04046 |
| LAPTM4B*1 allele | POU3F2 [T00630]       | 305 | 311 | 0.252682  | TGGATTT      | 0.18347 | 0.05356 |
| LAPTM4B*1 allele | FOXP3 [T04280]        | 175 | 183 | 14.668224 | AAAATCGCA    | 0.00764 | 0.00401 |
| LAPTM4B*1 allele | PEA3 [T00684]         | 182 | 189 | 8.315494  | CAAGGAAC     | 0.09174 | 0.0533  |
| LAPTM4B*1 allele | PEA3 [T00684]         | 244 | 251 | 4.375434  | GAAGGAAG     | 0.01529 | 0.01882 |
| LAPTM4B*1 allele | c-Ets-2 [T00113]      | 184 | 191 | 2.827022  | AGGAACCTA    | 0.09174 | 0.07753 |
| LAPTM4B*1 allele | c-Ets-2 [T00113]      | 246 | 253 | 4.629332  | AGGAAGGC     | 0.1376  | 0.14255 |
| LAPTM4B*1 allele | c-Myb [T00137]        | 186 | 193 | 13.847077 | GAATAGCA     | 0.06116 | 0.03125 |
| LAPTM4B*1 allele | c-Myb [T00137]        | 217 | 224 | 12.979731 | TGGAGTTA     | 0.1376  | 0.0721  |
| LAPTM4B*1 allele | AP-3 (2) [T00039]     | 194 | 200 | 11.290546 | CTAAAAG      | 0.36694 | 0.19834 |
| LAPTM4B*1 allele | HNF-3β [T02513]       | 195 | 201 | 3.504129  | TAAAAGA      | 0.30579 | 0.1321  |
| LAPTM4B*1 allele | HNF-3β [T02513]       | 306 | 312 | 3.66377   | GGATTTA      | 0.30579 | 0.1321  |
| LAPTM4B*1 allele | YY1 [T00915]          | 101 | 107 | 7.55849   | CCATTCG      | 0.33636 | 0.33922 |
| LAPTM4B*1 allele | YY1 [T00915]          | 213 | 219 | 8.35288   | TGAATGG      | 0.30579 | 0.25237 |
| LAPTM4B*1 allele | YY1 [T00915]          | 301 | 307 | 7.441476  | CTGATGG      | 0.33636 | 0.33922 |
| LAPTM4B*1 allele | YY1 [T00915]          | 376 | 382 | 3.973697  | CACATCG      | 0.12231 | 0.09733 |
| LAPTM4B*1 allele | Hlf [T01071]          | 221 | 229 | 6.667463  | GTTACACGA    | 0.02485 | 0.01102 |
| LAPTM4B*1 allele | Myf-3 [T00519]        | 234 | 241 | 2.45354   | CCAGATGA     | 0.10703 | 0.07462 |
| LAPTM4B*1 allele | Myf-3 [T00519]        | 336 | 343 | 0         | GCAGCTGG     | 0.1376  | 0.19853 |
| LAPTM4B*1 allele | MyoD [T00525]         | 234 | 241 | 2.45354   | CCAGATGA     | 0.10703 | 0.07462 |
| LAPTM4B*1 allele | MyoD [T00525]         | 336 | 343 | 0         | GCAGCTGG     | 0.1376  | 0.19853 |
| LAPTM4B*1 allele | NF-X3 [T01514]        | 235 | 242 | 5.226274  | CAGATGAA     | 0.08409 | 0.06977 |
| LAPTM4B*1 allele | NF-X3 [T01514]        | 456 | 463 | 8.793097  | CAGAAGCT     | 0.1376  | 0.13215 |
| LAPTM4B*1 allele | LCR-F1 [T01599]       | 238 | 243 | 5.346725  | ATGAAA       | 0.61157 | 0.32824 |
| LAPTM4B*1 allele | LCR-F1 [T01599]       | 356 | 361 | 0.029165  | ATGACG       | 0.48926 | 0.32166 |
| LAPTM4B*1 allele | p53 [T00671]          | 45  | 51  | 0.525867  | GGGCAGG      | 0.06116 | 0.15019 |
| LAPTM4B*1 allele | p53 [T00671]          | 118 | 124 | 8.914655  | GGGCGAG      | 0.30579 | 0.66358 |
| LAPTM4B*1 allele | p53 [T00671]          | 249 | 255 | 9.164941  | AAGGCC       | 0.30579 | 0.66358 |
| LAPTM4B*1 allele | p53 [T00671]          | 269 | 275 | 7.959461  | GGGCCGA      | 0.18347 | 0.35414 |
| LAPTM4B*1 allele | p53 [T00671]          | 346 | 352 | 9.966389  | GGAGCCC      | 0.12231 | 0.36584 |
| LAPTM4B*1 allele | p53 [T00671]          | 388 | 394 | 7.700559  | TCCGCC       | 0.12231 | 0.23097 |
| LAPTM4B*1 allele | p53 [T00671]          | 393 | 399 | 3.891597  | CCGCC        | 0.18347 | 0.50311 |
| LAPTM4B*1 allele | p53 [T00671]          | 489 | 495 | 3.624632  | CAGGCC       | 0.09174 | 0.19797 |
| LAPTM4B*1 allele | EIIaE-A [T00246]      | 43  | 49  | 14.472869 | TTGGGCA      | 0.79504 | 1.44055 |
| LAPTM4B*1 allele | EIIaE-A [T00246]      | 66  | 72  | 10.118218 | CCGGGAG      | 0.55042 | 1.06004 |

|                  |                      |     |     |           |               |         |         |
|------------------|----------------------|-----|-----|-----------|---------------|---------|---------|
| LAPTM4B*1 allele | EIIaE-A [T00246]     | 116 | 122 | 10.118218 | CTGGGCG       | 0.55042 | 1.06004 |
| LAPTM4B*1 allele | EIIaE-A [T00246]     | 167 | 173 | 8.709302  | AAGGGAA       | 0.55042 | 1.18679 |
| LAPTM4B*1 allele | EIIaE-A [T00246]     | 251 | 257 | 14.472869 | GGCCCGG       | 0.79504 | 1.44055 |
| LAPTM4B*1 allele | EIIaE-A [T00246]     | 267 | 273 | 10.118218 | CAGGGCC       | 0.55042 | 1.06004 |
| LAPTM4B*1 allele | EIIaE-A [T00246]     | 277 | 283 | 14.472869 | TAGGGGA       | 0.79504 | 1.44055 |
| LAPTM4B*1 allele | EIIaE-A [T00246]     | 290 | 296 | 8.709302  | GAGGGTG       | 0.55042 | 1.18679 |
| LAPTM4B*1 allele | EIIaE-A [T00246]     | 317 | 323 | 14.472869 | CCGGGTG       | 0.79504 | 1.44055 |
| LAPTM4B*1 allele | EIIaE-A [T00246]     | 348 | 354 | 13.063953 | AGCCCGC       | 0.79504 | 1.59022 |
| LAPTM4B*1 allele | EIIaE-A [T00246]     | 390 | 396 | 10.118218 | CGCCCGG       | 0.55042 | 1.06004 |
| LAPTM4B*1 allele | EIIaE-A [T00246]     | 395 | 401 | 8.709302  | CGCCCCC       | 0.55042 | 1.18679 |
| LAPTM4B*1 allele | EIIaE-A [T00246]     | 397 | 403 | 8.709302  | CCCCCTC       | 0.55042 | 1.18679 |
| LAPTM4B*1 allele | EIIaE-A [T00246]     | 401 | 407 | 14.472869 | CTCCCGG       | 0.79504 | 1.44055 |
| LAPTM4B*1 allele | EIIaE-A [T00246]     | 440 | 446 | 13.063953 | AAGGGTA       | 0.79504 | 1.59022 |
| LAPTM4B*1 allele | EIIaE-A [T00246]     | 491 | 497 | 13.063953 | GGCCCGC       | 0.79504 | 1.59022 |
| LAPTM4B*1 allele | NHP-1 [T00621]       | 256 | 262 | 9.83      | GGACCTC       | 0.45868 | 0.37409 |
| LAPTM4B*1 allele | NHP-1 [T00621]       | 357 | 363 | 9.83      | TGACGTC       | 0.45868 | 0.37409 |
| LAPTM4B*1 allele | NHP-1 [T00621]       | 358 | 364 | 9.83      | GACGTCA       | 0.45868 | 0.37409 |
| LAPTM4B*1 allele | NHP-1 [T00621]       | 371 | 377 | 6.571346  | CGGGTCA       | 0.09174 | 0.12311 |
| LAPTM4B*1 allele | TFIIB [T00818]       | 263 | 270 | 11.657154 | CACCTAGG      | 0.19876 | 0.28089 |
| LAPTM4B*1 allele | XPF-1 [T00906]       | 263 | 271 | 10.392427 | CACTCAGGG     | 0.1376  | 0.20921 |
| LAPTM4B*1 allele | EBF [T05427]         | 263 | 273 | 6.8994    | CACTCAGGGCC   | 0.00764 | 0.01846 |
| LAPTM4B*1 allele | MZF-1 [T00529]       | 277 | 283 | 2.220412  | TAGGGGA       | 0.12231 | 0.16327 |
| LAPTM4B*1 allele | MZF-1 [T00529]       | 402 | 408 | 1.166538  | TCCCCGT       | 0.12231 | 0.21277 |
| LAPTM4B*1 allele | MZF-1 [T00529]       | 408 | 414 | 0.112664  | TCCCCGC       | 0.12231 | 0.3098  |
| LAPTM4B*1 allele | NF-kappaB1 [T00593]  | 279 | 290 | 14.056581 | GGGACTGGCGG   | 0.01224 | 0.02439 |
| LAPTM4B*1 allele | Pax-5 [T00070]       | 295 | 301 | 7.762216  | TGCACGC       | 0.06116 | 0.12167 |
| LAPTM4B*1 allele | AhR:Arnt [T05394]    | 297 | 305 | 9.325207  | CACGCTGAT     | 0.0516  | 0.05428 |
| LAPTM4B*1 allele | U2F2 (Oct-2.1) [T006 | 172 | 179 | 8.36845   | AAGAAAT       | 0.06116 | 0.01676 |
| LAPTM4B*1 allele | U2F2 (Oct-2.1) [T006 | 308 | 315 | 11.697988 | ATTACTC       | 0.05351 | 0.01894 |
| LAPTM4B*1 allele | RAR-gamma [T00720]   | 311 | 318 | 5.085116  | TACTACC       | 0.06116 | 0.06447 |
| LAPTM4B*1 allele | Myf-5 [T00521]       | 329 | 341 | 11.871492 | AGTCCAGCAGCT  | 0.01615 | 0.02459 |
| LAPTM4B*1 allele | Myf-5 [T00521]       | 332 | 344 | 7.122895  | TCCAGCAGCTGGC | 0.00267 | 0.00396 |
| LAPTM4B*1 allele | Myf-5 [T00521]       | 415 | 427 | 14.24579  | CGCTGCAGCGGTC | 0.03006 | 0.04866 |
| LAPTM4B*1 allele | AP-4 [T00036]        | 333 | 343 | 1.268101  | CCAGCAGTGG    | 0.0037  | 0.00546 |
| LAPTM4B*1 allele | Tal-1 [T00790]       | 332 | 342 | 14.153038 | TCCAGCAGCTG   | 0.0387  | 0.04451 |
| LAPTM4B*1 allele | Tal-1 [T00790]       | 337 | 347 | 8.412013  | CAGTGGCTGG    | 0.01935 | 0.02734 |
| LAPTM4B*1 allele | DP-1 [T01548]        | 346 | 355 | 14.492168 | GGAGCCCGCG    | 0.0516  | 0.16567 |
| LAPTM4B*1 allele | DP-1 [T01548]        | 406 | 415 | 12.705831 | CGTCCCGCC     | 0.0516  | 0.14405 |
| LAPTM4B*1 allele | E2F-1 [T01542]       | 72  | 78  | 5.331496  | GGCGGAG       | 0.12231 | 0.41733 |
| LAPTM4B*1 allele | E2F-1 [T01542]       | 286 | 292 | 5.331496  | GGCGGAG       | 0.12231 | 0.41733 |
| LAPTM4B*1 allele | E2F-1 [T01542]       | 349 | 355 | 5.944817  | GCCCGCG       | 0.12231 | 0.39652 |
| LAPTM4B*1 allele | E2F-1 [T01542]       | 387 | 393 | 7.879274  | TCCCGCC       | 0.30579 | 0.74391 |
| LAPTM4B*1 allele | E2F-1 [T01542]       | 392 | 398 | 3.397038  | CCCCGCC       | 0.18347 | 0.43342 |
| LAPTM4B*1 allele | E2F-1 [T01542]       | 409 | 415 | 3.397038  | CCCCGCC       | 0.18347 | 0.43342 |
| LAPTM4B*1 allele | E2F-1 [T01542]       | 412 | 418 | 7.060495  | CGCCGCT       | 0.12231 | 0.26595 |
| LAPTM4B*1 allele | E2F-1 [T01542]       | 421 | 427 | 10.575502 | AGCGGTC       | 0.12231 | 0.15928 |
| LAPTM4B*1 allele | E2F-1 [T01542]       | 492 | 498 | 5.944817  | GCCCGCG       | 0.12231 | 0.39652 |
| LAPTM4B*1 allele | E2F-1 [T01543]       | 350 | 358 | 4.354054  | CCCAGCATG     | 0.0688  | 0.13723 |
| LAPTM4B*1 allele | E2F-1 [T01543]       | 393 | 401 | 6.363515  | CCCCGCC       | 0.0516  | 0.23697 |
| LAPTM4B*1 allele | E2F-1 [T01543]       | 410 | 418 | 6.570994  | CCCCCGCT      | 0.0516  | 0.23697 |
| LAPTM4B*1 allele | E2F-1 [T01543]       | 492 | 500 | 7.224594  | CCCCCGGGT     | 0.0344  | 0.13242 |
| LAPTM4B*1 allele | USF2b [T02377]       | 353 | 360 | 12.629773 | GCATGAC       | 0.55042 | 0.43861 |
| LAPTM4B*1 allele | USF2b [T02377]       | 361 | 368 | 11.374018 | GTACAGGA      | 0.27521 | 0.34414 |
| LAPTM4B*1 allele | USF2b [T02377]       | 374 | 381 | 1.255756  | GTACATG       | 0.06116 | 0.04568 |
| LAPTM4B*1 allele | c-Jun [T00132]       | 357 | 363 | 4.469954  | TGACGTC       | 0.21405 | 0.18571 |
| LAPTM4B*1 allele | c-Jun [T00132]       | 358 | 364 | 4.469954  | GACGTCA       | 0.21405 | 0.18571 |
| LAPTM4B*1 allele | c-Jun [T00132]       | 371 | 377 | 4.522753  | CGGGTCA       | 0.21405 | 0.18571 |
| LAPTM4B*1 allele | CREMalpha [T01803]   | 353 | 364 | 7.13467   | GCGATGACGTCA  | 0.00753 | 0.0043  |
| LAPTM4B*1 allele | CREMalpha [T01803]   | 357 | 368 | 5.668944  | TGACGTACGGA   | 0.00251 | 0.00183 |
| LAPTM4B*1 allele | CREB [T00163]        | 356 | 364 | 0.032925  | ATGACGTCA     | 0.00764 | 0.00545 |
| LAPTM4B*1 allele | CREB [T00163]        | 357 | 365 | 0.024694  | TGACGTCA      | 0.00764 | 0.00545 |
| LAPTM4B*1 allele | ATF-2 [T00167]       | 356 | 364 | 0.034254  | ATGACGTCA     | 0.00764 | 0.00545 |
| LAPTM4B*1 allele | ATF-2 [T00167]       | 357 | 365 | 0         | TGACGTCA      | 0.00764 | 0.00545 |
| LAPTM4B*1 allele | ATF [T00051]         | 356 | 364 | 0.462475  | ATGACGTCA     | 0.00956 | 0.00658 |
| LAPTM4B*1 allele | ATF [T00051]         | 357 | 365 | 0.313871  | TGACGTCA      | 0.00956 | 0.00658 |
| LAPTM4B*1 allele | E4F [T00222]         | 357 | 365 | 12.100443 | TGACGTCA      | 0.04587 | 0.02801 |
| LAPTM4B*1 allele | c-Fos [T00123]       | 356 | 363 | 10.285697 | ATGACGTCA     | 0.12231 | 0.0851  |
| LAPTM4B*1 allele | c-Fos [T00123]       | 358 | 365 | 11.816087 | GACGTCA       | 0.0688  | 0.04757 |
| LAPTM4B*1 allele | c-Fos [T00123]       | 371 | 378 | 11.455199 | CGGGTCA       | 0.10703 | 0.10587 |
| LAPTM4B*1 allele | ATF-1 [T00968]       | 355 | 365 | 2.828372  | GATGACGTCA    | 0.00167 | 0.00189 |
| LAPTM4B*1 allele | ATF-1 [T00968]       | 356 | 366 | 3.669682  | ATGACGTCA     | 0.0043  | 0.00406 |
| LAPTM4B*1 allele | T3R-alpha1 [T01152]  | 367 | 377 | 13.79108  | GACTCGGGTCA   | 0.08314 | 0.06654 |
| LAPTM4B*1 allele | ER-beta [T04651]     | 369 | 377 | 9.122536  | CTCGGGTCA     | 0.00764 | 0.00888 |
| LAPTM4B*1 allele | RAR-beta [T00721]    | 370 | 377 | 2.799654  | TCGGGTCA      | 0.05351 | 0.08056 |
| LAPTM4B*1 allele | ER-alpha [T00261]    | 371 | 378 | 1.367305  | CGGGTCA       | 0.09938 | 0.09901 |
| LAPTM4B*1 allele | NFI/CTF [T00094]     | 35  | 42  | 2.683003  | TCGGTTCG      | 0.01529 | 0.02455 |
| LAPTM4B*1 allele | NFI/CTF [T00094]     | 39  | 46  | 8.241664  | TGGTTCG       | 0.04587 | 0.05391 |
| LAPTM4B*1 allele | NFI/CTF [T00094]     | 321 | 328 | 5.558661  | GTGCTTCG      | 0.1376  | 0.11996 |
| LAPTM4B*1 allele | NFI/CTF [T00094]     | 383 | 390 | 13.146004 | CCAAGTCC      | 0.27521 | 0.1551  |
| LAPTM4B*1 allele | Sp3 [T02338]         | 387 | 395 | 5.19869   | GTCCGCCCC     | 0.02293 | 0.08583 |
| LAPTM4B*1 allele | Sp3 [T02338]         | 392 | 400 | 0         | CCCCGCCCC     | 0.00191 | 0.01352 |
| LAPTM4B*1 allele | GCF [T00320]         | 390 | 400 | 5.946992  | CGCCCGCCCC    | 0.00323 | 0.01919 |
| LAPTM4B*1 allele | MAZ [T00490]         | 393 | 403 | 14.391959 | CCCGCCCTC     | 0.03512 | 0.15075 |
| LAPTM4B*1 allele | MAZ [T00490]         | 399 | 409 | 1.454467  | CCCTCCCGTC    | 0.00418 | 0.01681 |
| LAPTM4B*1 allele | MAZ [T00490]         | 405 | 415 | 14.561456 | CGTCCCGCC     | 0.03512 | 0.15075 |
| LAPTM4B*1 allele | WT1 [T00899]         | 395 | 405 | 7.524526  | CGCCCTCC      | 0.00382 | 0.02276 |
| LAPTM4B*1 allele | WT1 [T00899]         | 406 | 416 | 11.883285 | GTCCCGCCG     | 0.0258  | 0.10484 |
| LAPTM4B*1 allele | R1 [T00711]          | 287 | 298 | 11.545139 | GCGGAGGTGCA   | 0.0129  | 0.03427 |
| LAPTM4B*1 allele | R1 [T00711]          | 395 | 406 | 8.256952  | CGCCCTCC      | 0.00932 | 0.02482 |

|                  |                        |     |     |           |               |         |         |
|------------------|------------------------|-----|-----|-----------|---------------|---------|---------|
| LAPTM4B*1 allele | LF-A1 [T00467]         | 7   | 13  | 9.701266  | GGTGGCA       | 0.55042 | 0.74465 |
| LAPTM4B*1 allele | LF-A1 [T00467]         | 43  | 49  | 1.561557  | TTGGGCA       | 0.27521 | 0.49037 |
| LAPTM4B*1 allele | LF-A1 [T00467]         | 451 | 457 | 8.920488  | CCCGGCA       | 0.36694 | 0.51402 |
| LAPTM4B*1 allele | LF-A1 [T00467]         | 484 | 490 | 5.631412  | GGAGGCA       | 0.27521 | 0.32654 |
| LAPTM4B*1 allele | GATA-1 [T00306]        | 476 | 481 | 1.908093  | GGTATC        | 0.73389 | 0.35601 |
| LAPTM4B*1 allele | WT1 I -KTS [T00900]    | 347 | 356 | 14.457704 | GAGCCCCGGA    | 0.04491 | 0.19021 |
| LAPTM4B*1 allele | WT1 I -KTS [T00900]    | 394 | 403 | 10.053856 | CCGCCCCCTC    | 0.00764 | 0.04259 |
| LAPTM4B*1 allele | WT1 I -KTS [T00900]    | 405 | 414 | 14.586256 | CCGTCCCGC     | 0.04491 | 0.19021 |
| LAPTM4B*1 allele | WT1 -KTS [T01839]      | 347 | 356 | 14.457704 | GAGCCCCGGA    | 0.04491 | 0.19021 |
| LAPTM4B*1 allele | WT1 -KTS [T01839]      | 394 | 403 | 10.053856 | CCGCCCCCTC    | 0.00764 | 0.04259 |
| LAPTM4B*1 allele | WT1 -KTS [T01839]      | 405 | 414 | 14.586256 | CCGTCCCGC     | 0.04491 | 0.19021 |
| LAPTM4B*1 allele | IA-1 [T05887]          | 394 | 406 | 6.673112  | CCGCCCCCTCCCC | 0.00097 | 0.0038  |
| LAPTM4B*1 allele | ETF [T00270]           | 387 | 395 | 1.261043  | GTCCGCCCC     | 0.02867 | 0.09432 |
| LAPTM4B*1 allele | ETF [T00270]           | 392 | 400 | 0         | CCCCGCCCC     | 0.00191 | 0.01352 |
| LAPTM4B*1 allele | NF-1 [T00539]          | 382 | 386 | 0         | GCCAA         | 0.48926 | 0.54339 |
| LAPTM4B*1 allele | USF2 [T00878]          | 373 | 381 | 3.706299  | GGTCACATG     | 0.01147 | 0.0105  |
| LAPTM4B*1 allele | T3R-beta1 [T00851]     | 370 | 380 | 13.382055 | TCGGGTCACAT   | 0.0602  | 0.05079 |
| LAPTM4B*1 allele | ARP-1 [T00045]         | 369 | 377 | 3.301012  | CTCGGGTCA     | 0.00764 | 0.00821 |
| LAPTM4B*1 allele | E4F1 [T00223]          | 357 | 365 | 0.123447  | TGACGTAC      | 0.03058 | 0.02893 |
| LAPTM4B*1 allele | E12 [T00204]           | 332 | 344 | 14.548481 | TCCAGCAGTGGC  | 0.00753 | 0.01182 |
| LAPTM4B*1 allele | TFII-I [T00824]        | 303 | 313 | 6.490932  | GATGGAITTAC   | 0.00764 | 0.00718 |
| LAPTM4B*1 allele | Pbx1b [T02087]         | 236 | 245 | 14.774452 | AGATGAAAGA    | 0.0516  | 0.03184 |
| LAPTM4B*1 allele | Pbx1b [T02087]         | 299 | 308 | 8.781358  | CGCTGATGGA    | 0.0258  | 0.01017 |
| LAPTM4B*1 allele | Arnt [T01346]          | 297 | 305 | 10.586083 | CACGCTGAT     | 0.02293 | 0.03292 |
| LAPTM4B*1 allele | AhR [T01795]           | 294 | 301 | 2.665859  | GTGCACGC      | 0.11467 | 0.18662 |
| LAPTM4B*1 allele | RCS1 [T03538]          | 290 | 301 | 9.535158  | GAGGGTGCACGC  | 0.00376 | 0.00745 |
| LAPTM4B*1 allele | HMG I(Y) [T02368]      | 170 | 176 | 5.151271  | GGAAGAA       | 0.15289 | 0.11288 |
| LAPTM4B*1 allele | HMG I(Y) [T02368]      | 185 | 191 | 4.951498  | GGAACTA       | 0.15289 | 0.11288 |
| LAPTM4B*1 allele | HMG I(Y) [T02368]      | 247 | 253 | 7.014009  | GGAAGGC       | 0.15289 | 0.27476 |
| LAPTM4B*1 allele | STAT4 [T01577]         | 170 | 175 | 4.411765  | GGAAGA        | 0.48926 | 0.63417 |
| LAPTM4B*1 allele | STAT4 [T01577]         | 185 | 190 | 1.470588  | GGAACT        | 0.48926 | 0.39374 |
| LAPTM4B*1 allele | STAT4 [T01577]         | 247 | 252 | 5.882353  | GGAAGG        | 0.12231 | 0.21277 |
| LAPTM4B*1 allele | c-Ets-1 [T00112]       | 168 | 174 | 6.471844  | AGGGGAAAG     | 0.12231 | 0.173   |
| LAPTM4B*1 allele | c-Ets-1 [T00112]       | 183 | 189 | 4.46609   | AAGGAAC       | 0.15289 | 0.14506 |
| LAPTM4B*1 allele | c-Ets-1 [T00112]       | 245 | 251 | 0.484609  | AAGGAAG       | 0.09174 | 0.10593 |
| LAPTM4B*1 allele | ox binding factor [T00 | 239 | 248 | 8.695301  | TGAAAGAAGG    | 0.0559  | 0.04456 |
| LAPTM4B*1 allele | HSF1 (long) [T01042]   | 210 | 217 | 0         | CCTTGAAT      | 0.02293 | 0.01458 |
| LAPTM4B*1 allele | HSF1 (short) [T02104]  | 210 | 217 | 0         | CCTTGAAT      | 0.02293 | 0.01458 |
| LAPTM4B*1 allele | HNF-1B [T01950]        | 22  | 29  | 14.384751 | TAATCCCA      | 0.10703 | 0.04856 |
| LAPTM4B*1 allele | NFdeltaE3A [T00976]    | 4   | 13  | 13.153012 | TGTGGTGGCA    | 0.0172  | 0.01577 |
| LAPTM4B*1 allele | AML1a [T02256]         | 0   | 9   | 7.146755  | CGGGTGTGGT    | 0.01386 | 0.01471 |

Table S2. LAPT4B\*2 allele transcription factor prediction results of online database

| Sequence name   | Factor name      | Start position | End position | Dissimilarity | String       | RE equally | RE query |
|-----------------|------------------|----------------|--------------|---------------|--------------|------------|----------|
| LAPT4B*2 allele | VDR [T00885]     | 1              | 4            | 0             | GGGT         | 2.03125    | 2.78039  |
| LAPT4B*2 allele | VDR [T00885]     | 64             | 67           | 0             | ACCC         | 2.03125    | 2.78039  |
| LAPT4B*2 allele | VDR [T00885]     | 208            | 211          | 0             | ACCC         | 2.03125    | 2.78039  |
| LAPT4B*2 allele | VDR [T00885]     | 292            | 295          | 0             | GGGT         | 2.03125    | 2.78039  |
| LAPT4B*2 allele | VDR [T00885]     | 319            | 322          | 0             | GGGT         | 2.03125    | 2.78039  |
| LAPT4B*2 allele | VDR [T00885]     | 391            | 394          | 0             | GGGT         | 2.03125    | 2.78039  |
| LAPT4B*2 allele | VDR [T00885]     | 461            | 464          | 0             | GGGT         | 2.03125    | 2.78039  |
| LAPT4B*2 allele | VDR [T00885]     | 469            | 472          | 0             | ACCC         | 2.03125    | 2.78039  |
| LAPT4B*2 allele | VDR [T00885]     | 494            | 497          | 0             | GGGT         | 2.03125    | 2.78039  |
| LAPT4B*2 allele | WT1 I [T01840]   | 3              | 9            | 5.136498      | GTGTGGT      | 0.19043    | 0.27782  |
| LAPT4B*2 allele | WT1 I [T01840]   | 85             | 91           | 8.128015      | GTGAGCC      | 0.19043    | 0.2886   |
| LAPT4B*2 allele | WT1 I [T01840]   | 311            | 317          | 7.513446      | TACTCAC      | 0.09521    | 0.10337  |
| LAPT4B*2 allele | ENKTF-1 [T00255] | 9              | 16           | 13.885529     | TGGCAAGC     | 0.28564    | 0.40596  |
| LAPT4B*2 allele | ENKTF-1 [T00255] | 96             | 103          | 6.942764      | TCGCGCCA     | 0.38086    | 0.5915   |
| LAPT4B*2 allele | ENKTF-1 [T00255] | 229            | 236          | 12.629773     | AACGGCCA     | 0.57129    | 0.68978  |
| LAPT4B*2 allele | ENKTF-1 [T00255] | 285            | 292          | 1.255756      | TGGCGGAG     | 0.06348    | 0.12883  |
| LAPT4B*2 allele | ENKTF-1 [T00255] | 360            | 367          | 13.885529     | TGGCTGGA     | 0.28564    | 0.40596  |
| LAPT4B*2 allele | ENKTF-1 [T00255] | 397            | 404          | 6.942764      | CATGGCCA     | 0.38086    | 0.5915   |
| LAPT4B*2 allele | ENKTF-1 [T00255] | 399            | 406          | 6.942764      | TGGCCAAG     | 0.38086    | 0.5915   |
| LAPT4B*2 allele | p300 [T01427]    | 23             | 27           | 1.540766      | AATCC        | 0.50781    | 0.32684  |
| LAPT4B*2 allele | p300 [T01427]    | 50             | 54           | 3.482089      | GGAGA        | 1.01562    | 1.66661  |
| LAPT4B*2 allele | p300 [T01427]    | 69             | 73           | 3.482089      | GGAGG        | 1.01562    | 1.66661  |
| LAPT4B*2 allele | p300 [T01427]    | 75             | 79           | 3.482089      | GGAGG        | 1.01562    | 1.66661  |
| LAPT4B*2 allele | p300 [T01427]    | 108            | 112          | 0.770383      | ACTCC        | 0.50781    | 0.5441   |
| LAPT4B*2 allele | p300 [T01427]    | 170            | 174          | 5.408046      | GGAAG        | 1.01562    | 1.12972  |
| LAPT4B*2 allele | p300 [T01427]    | 185            | 189          | 5.795432      | GGAAC        | 0.50781    | 0.60764  |
| LAPT4B*2 allele | p300 [T01427]    | 218            | 222          | 0.770383      | GGAGT        | 0.50781    | 0.5441   |
| LAPT4B*2 allele | p300 [T01427]    | 247            | 251          | 5.408046      | GGAAG        | 1.01562    | 1.12972  |
| LAPT4B*2 allele | p300 [T01427]    | 256            | 260          | 3.099092      | GGACC        | 0.50781    | 0.86923  |
| LAPT4B*2 allele | p300 [T01427]    | 259            | 263          | 3.482089      | CCTCC        | 1.01562    | 1.66661  |
| LAPT4B*2 allele | p300 [T01427]    | 281            | 285          | 0             | GGACT        | 0.50781    | 0.52761  |
| LAPT4B*2 allele | p300 [T01427]    | 289            | 293          | 3.482089      | GGAGG        | 1.01562    | 1.66661  |
| LAPT4B*2 allele | p300 [T01427]    | 306            | 310          | 1.540766      | GGATT        | 0.50781    | 0.32684  |
| LAPT4B*2 allele | p300 [T01427]    | 327            | 331          | 3.869475      | GGAGC        | 0.50781    | 0.91795  |
| LAPT4B*2 allele | p300 [T01427]    | 330            | 334          | 3.869475      | GCTCC        | 0.50781    | 0.91795  |
| LAPT4B*2 allele | p300 [T01427]    | 346            | 350          | 3.869475      | GGAGC        | 0.50781    | 0.91795  |
| LAPT4B*2 allele | p300 [T01427]    | 349            | 353          | 3.869475      | GCTCC        | 0.50781    | 0.91795  |
| LAPT4B*2 allele | p300 [T01427]    | 365            | 369          | 3.869475      | GGAGC        | 0.50781    | 0.91795  |
| LAPT4B*2 allele | p300 [T01427]    | 385            | 389          | 0             | GGACT        | 0.50781    | 0.52761  |
| LAPT4B*2 allele | p300 [T01427]    | 405            | 409          | 0             | AGTCC        | 0.50781    | 0.52761  |
| LAPT4B*2 allele | p300 [T01427]    | 419            | 423          | 3.482089      | CCTCC        | 1.01562    | 1.66661  |
| LAPT4B*2 allele | p300 [T01427]    | 425            | 429          | 2.711705      | CGTCC        | 1.52344    | 1.87952  |
| LAPT4B*2 allele | p300 [T01427]    | 453            | 457          | 3.869475      | GGAGC        | 0.50781    | 0.91795  |
| LAPT4B*2 allele | p300 [T01427]    | 484            | 488          | 3.869475      | GGAGC        | 0.50781    | 0.91795  |
| LAPT4B*2 allele | p300 [T01427]    | 503            | 507          | 3.482089      | GGAGG        | 1.01562    | 1.66661  |
| LAPT4B*2 allele | R2 [T00712]      | 25             | 30           | 14.26934      | TCCAG        | 1.52344    | 1.74102  |
| LAPT4B*2 allele | R2 [T00712]      | 47             | 52           | 11.337888     | GCAGGA       | 0.63477    | 0.89231  |
| LAPT4B*2 allele | R2 [T00712]      | 72             | 77           | 9.512894      | GGCGGA       | 1.9043     | 2.12254  |
| LAPT4B*2 allele | R2 [T00712]      | 110            | 115          | 1.824994      | TCCAGC       | 0.12695    | 0.16258  |
| LAPT4B*2 allele | R2 [T00712]      | 167            | 172          | 14.26934      | AAGGGA       | 1.52344    | 1.74102  |
| LAPT4B*2 allele | R2 [T00712]      | 215            | 220          | 9.512894      | AATGGA       | 1.9043     | 2.12254  |
| LAPT4B*2 allele | R2 [T00712]      | 244            | 249          | 9.512894      | GAAGGA       | 1.9043     | 2.12254  |
| LAPT4B*2 allele | R2 [T00712]      | 261            | 266          | 9.512894      | TCCACT       | 1.9043     | 2.12254  |
| LAPT4B*2 allele | R2 [T00712]      | 278            | 283          | 14.26934      | AGGGGA       | 1.52344    | 1.74102  |
| LAPT4B*2 allele | R2 [T00712]      | 286            | 291          | 9.512894      | GGCGGA       | 1.9043     | 2.12254  |
| LAPT4B*2 allele | R2 [T00712]      | 303            | 308          | 0             | GATGGA       | 0.38086    | 0.38152  |
| LAPT4B*2 allele | R2 [T00712]      | 324            | 329          | 9.512894      | CTTGGA       | 1.9043     | 2.12254  |
| LAPT4B*2 allele | R2 [T00712]      | 332            | 337          | 1.824994      | TCCAGC       | 0.12695    | 0.16258  |
| LAPT4B*2 allele | R2 [T00712]      | 343            | 348          | 9.512894      | CTTGGA       | 1.9043     | 2.12254  |
| LAPT4B*2 allele | R2 [T00712]      | 351            | 356          | 1.824994      | TCCAGC       | 0.12695    | 0.16258  |
| LAPT4B*2 allele | R2 [T00712]      | 362            | 367          | 1.824994      | GCTGGA       | 0.12695    | 0.16258  |
| LAPT4B*2 allele | R2 [T00712]      | 407            | 412          | 9.512894      | TCCGCC       | 1.9043     | 2.12254  |
| LAPT4B*2 allele | R2 [T00712]      | 421            | 426          | 14.26934      | TCCCG        | 1.52344    | 1.74102  |
| LAPT4B*2 allele | R2 [T00712]      | 427            | 432          | 14.26934      | TCCCG        | 1.52344    | 1.74102  |
| LAPT4B*2 allele | R2 [T00712]      | 450            | 455          | 14.26934      | TTCGGA       | 1.52344    | 1.74102  |
| LAPT4B*2 allele | Ik-1 [T02702]    | 25             | 37           | 4.748597      | TCCCAGTACTCG | 0.00081    | 0.00156  |
| LAPT4B*2 allele | AIRE [T05990]    | 39             | 48           | 10.110876     | TTGGTTGGGC   | 0.04265    | 0.03058  |
| LAPT4B*2 allele | Elk-1 [T00250]   | 23             | 27           | 6.853012      | AATCC        | 1.52344    | 1.52572  |

|                  |                       |     |     |           |              |         |         |
|------------------|-----------------------|-----|-----|-----------|--------------|---------|---------|
| LAPTM4B*2 allele | Elk-1 [T00250]        | 50  | 54  | 7.213232  | GGAGA        | 1.52344 | 1.52572 |
| LAPTM4B*2 allele | Elk-1 [T00250]        | 69  | 73  | 5.092035  | GGAGG        | 0.50781 | 0.99535 |
| LAPTM4B*2 allele | Elk-1 [T00250]        | 75  | 79  | 5.092035  | GGAGG        | 0.50781 | 0.99535 |
| LAPTM4B*2 allele | Elk-1 [T00250]        | 108 | 112 | 7.984576  | ACTCC        | 0.50781 | 0.5441  |
| LAPTM4B*2 allele | Elk-1 [T00250]        | 170 | 174 | 0         | GGAAG        | 0.50781 | 0.67126 |
| LAPTM4B*2 allele | Elk-1 [T00250]        | 185 | 189 | 2.314032  | GGAAC        | 0.50781 | 0.60764 |
| LAPTM4B*2 allele | Elk-1 [T00250]        | 218 | 222 | 7.984576  | GGAGT        | 0.50781 | 0.5441  |
| LAPTM4B*2 allele | Elk-1 [T00250]        | 247 | 251 | 0         | GGAAG        | 0.50781 | 0.67126 |
| LAPTM4B*2 allele | Elk-1 [T00250]        | 256 | 260 | 6.274504  | GGACC        | 1.01562 | 1.39684 |
| LAPTM4B*2 allele | Elk-1 [T00250]        | 259 | 263 | 5.092035  | CCTCC        | 0.50781 | 0.99535 |
| LAPTM4B*2 allele | Elk-1 [T00250]        | 281 | 285 | 6.853012  | GGACT        | 1.52344 | 1.52572 |
| LAPTM4B*2 allele | Elk-1 [T00250]        | 289 | 293 | 5.092035  | GGAGG        | 0.50781 | 0.99535 |
| LAPTM4B*2 allele | Elk-1 [T00250]        | 306 | 310 | 6.853012  | GGATT        | 1.52344 | 1.52572 |
| LAPTM4B*2 allele | Elk-1 [T00250]        | 327 | 331 | 7.406067  | GGAGC        | 0.50781 | 0.91795 |
| LAPTM4B*2 allele | Elk-1 [T00250]        | 330 | 334 | 7.406067  | GCTCC        | 0.50781 | 0.91795 |
| LAPTM4B*2 allele | Elk-1 [T00250]        | 346 | 350 | 7.406067  | GGAGC        | 0.50781 | 0.91795 |
| LAPTM4B*2 allele | Elk-1 [T00250]        | 349 | 353 | 7.406067  | GCTCC        | 0.50781 | 0.91795 |
| LAPTM4B*2 allele | Elk-1 [T00250]        | 365 | 369 | 7.406067  | GGAGC        | 0.50781 | 0.91795 |
| LAPTM4B*2 allele | Elk-1 [T00250]        | 385 | 389 | 6.853012  | GGACT        | 1.52344 | 1.52572 |
| LAPTM4B*2 allele | Elk-1 [T00250]        | 405 | 409 | 6.853012  | AGTCC        | 1.52344 | 1.52572 |
| LAPTM4B*2 allele | Elk-1 [T00250]        | 419 | 423 | 5.092035  | CCTCC        | 0.50781 | 0.99535 |
| LAPTM4B*2 allele | Elk-1 [T00250]        | 425 | 429 | 3.960472  | CGTCC        | 1.01562 | 1.46205 |
| LAPTM4B*2 allele | Elk-1 [T00250]        | 453 | 457 | 7.406067  | GGAGC        | 0.50781 | 0.91795 |
| LAPTM4B*2 allele | Elk-1 [T00250]        | 484 | 488 | 7.406067  | GGAGC        | 0.50781 | 0.91795 |
| LAPTM4B*2 allele | Elk-1 [T00250]        | 503 | 507 | 5.092035  | GGAGG        | 0.50781 | 0.99535 |
| LAPTM4B*2 allele | R-beta:RXR-alpha [T05 | 56  | 67  | 12.463326 | TCGCTTGAACCC | 0.03403 | 0.0696  |
| LAPTM4B*2 allele | Nkx2-1 [T00857]       | 67  | 73  | 1.361249  | CGGGAGG      | 0.09521 | 0.23977 |
| LAPTM4B*2 allele | Nkx2-1 [T00857]       | 73  | 79  | 4.033796  | GCGGAGG      | 0.22217 | 0.34697 |
| LAPTM4B*2 allele | Nkx2-1 [T00857]       | 259 | 265 | 2.672547  | CCTCCAC      | 0.03174 | 0.05358 |
| LAPTM4B*2 allele | Nkx2-1 [T00857]       | 287 | 293 | 4.033796  | GCGGAGG      | 0.22217 | 0.34697 |
| LAPTM4B*2 allele | Nkx2-1 [T00857]       | 419 | 425 | 4.033796  | CCTCCCC      | 0.22217 | 0.34697 |
| LAPTM4B*2 allele | Nkx2-1 [T00857]       | 498 | 504 | 4.912497  | ATCGAGG      | 0.44434 | 0.45317 |
| LAPTM4B*2 allele | Nkx2-1 [T00857]       | 501 | 507 | 4.033796  | GAGGAGG      | 0.22217 | 0.34697 |
| LAPTM4B*2 allele | AP-2alphaA [T00035]   | 17  | 22  | 1.437215  | GCCTGT       | 0.12695 | 0.17759 |
| LAPTM4B*2 allele | AP-2alphaA [T00035]   | 69  | 74  | 2.003202  | GGAGGC       | 0.25391 | 0.56136 |
| LAPTM4B*2 allele | AP-2alphaA [T00035]   | 114 | 119 | 0.159691  | GCCTGG       | 0.25391 | 0.53157 |
| LAPTM4B*2 allele | AP-2alphaA [T00035]   | 248 | 253 | 3.004803  | GAAGGC       | 0.38086 | 0.53417 |
| LAPTM4B*2 allele | AP-2alphaA [T00035]   | 447 | 452 | 3.004803  | GCCTTC       | 0.38086 | 0.53417 |
| LAPTM4B*2 allele | AP-2alphaA [T00035]   | 503 | 508 | 2.003202  | GGAGGC       | 0.25391 | 0.56136 |
| LAPTM4B*2 allele | AP-2alphaA [T00035]   | 507 | 512 | 0         | GCAGGC       | 0.25391 | 0.53157 |
| LAPTM4B*2 allele | Sp1 [T00759]          | 69  | 77  | 9.532578  | GGAGGCGGA    | 0.05356 | 0.16378 |
| LAPTM4B*2 allele | Sp1 [T00759]          | 283 | 291 | 11.706922 | ACTGGCGGA    | 0.04364 | 0.08976 |
| LAPTM4B*2 allele | Sp1 [T00759]          | 407 | 415 | 2.421386  | TCCGCCCCG    | 0.02182 | 0.08543 |
| LAPTM4B*2 allele | Sp1 [T00759]          | 412 | 420 | 0         | CCCGCCCCC    | 0.00793 | 0.04405 |
| LAPTM4B*2 allele | Sp1 [T00759]          | 429 | 437 | 8.565378  | CCCGCCGCT    | 0.03571 | 0.1167  |
| LAPTM4B*2 allele | C/EBPalphA [T00108]   | 9   | 14  | 3.200469  | TGGCAA       | 0.76172 | 0.81548 |
| LAPTM4B*2 allele | C/EBPalphA [T00108]   | 80  | 85  | 0.527529  | TTGCAG       | 0.25391 | 0.16214 |
| LAPTM4B*2 allele | C/EBPalphA [T00108]   | 104 | 109 | 0         | TTGCAC       | 0.25391 | 0.17301 |
| LAPTM4B*2 allele | C/EBPalphA [T00108]   | 179 | 184 | 3.022085  | TCGCAA       | 0.76172 | 0.81548 |
| LAPTM4B*2 allele | C/EBPbeta [T00581]    | 8   | 14  | 4.807336  | GTGGCAA      | 0.25391 | 0.21138 |
| LAPTM4B*2 allele | C/EBPbeta [T00581]    | 80  | 86  | 4.329855  | TTGCAGT      | 0.22217 | 0.16143 |
| LAPTM4B*2 allele | C/EBPbeta [T00581]    | 104 | 110 | 0.805985  | TTGCACT      | 0.09521 | 0.0763  |
| LAPTM4B*2 allele | C/EBPbeta [T00581]    | 178 | 184 | 4.807336  | ATCGCAA      | 0.25391 | 0.21138 |
| LAPTM4B*2 allele | E2F-1:DP-1 [T05204]   | 95  | 103 | 2.513294  | ATCGCGCCA    | 0.00595 | 0.01109 |
| LAPTM4B*2 allele | E2F-1:DP-1 [T05204]   | 285 | 293 | 14.802692 | TGGCGGAGG    | 0.03174 | 0.07884 |
| LAPTM4B*2 allele | E2F-1:DP-1 [T05204]   | 410 | 418 | 12.662304 | GCCCCGCC     | 0.07538 | 0.2151  |
| LAPTM4B*2 allele | E2F-1:DP-1 [T05204]   | 427 | 435 | 10.023625 | TCCCCGCCG    | 0.04562 | 0.11667 |
| LAPTM4B*2 allele | CUTL1 [T00100]        | 103 | 108 | 2.06853   | ATTGCA       | 0.76172 | 0.43815 |
| LAPTM4B*2 allele | XR:RXR-alpha [T05670] | 103 | 111 | 11.263007 | ATTGCACTC    | 0.03174 | 0.02398 |
| LAPTM4B*2 allele | BTEB3 [T05051]        | 71  | 79  | 3.496398  | AGGCGGAGG    | 0.01984 | 0.03464 |
| LAPTM4B*2 allele | BTEB3 [T05051]        | 108 | 116 | 14.933149 | ACTCCAGCC    | 0.06348 | 0.10054 |
| LAPTM4B*2 allele | BTEB3 [T05051]        | 214 | 222 | 12.17827  | GAATGGAGT    | 0.09125 | 0.13877 |
| LAPTM4B*2 allele | BTEB3 [T05051]        | 259 | 267 | 7.847399  | CCTCCACTC    | 0.05951 | 0.11517 |
| LAPTM4B*2 allele | BTEB3 [T05051]        | 285 | 293 | 11.761034 | TGGCGGAGG    | 0.09125 | 0.13877 |
| LAPTM4B*2 allele | BTEB3 [T05051]        | 419 | 427 | 5.813911  | CCTCCCCGT    | 0.0119  | 0.01657 |
| LAPTM4B*2 allele | E47 [T00207]          | 26  | 32  | 4.682492  | CCCAGCT      | 0.25391 | 0.37276 |
| LAPTM4B*2 allele | E47 [T00207]          | 110 | 116 | 4.327662  | TCCAGCC      | 0.25391 | 0.37276 |
| LAPTM4B*2 allele | E47 [T00207]          | 114 | 120 | 5.305872  | GCCTGGG      | 0.22217 | 0.31418 |
| LAPTM4B*2 allele | E47 [T00207]          | 233 | 239 | 0         | GCCAGAT      | 0.06348 | 0.08332 |
| LAPTM4B*2 allele | E47 [T00207]          | 282 | 288 | 4.485315  | GACTGGC      | 0.25391 | 0.37276 |

|                  |                     |     |     |           |              |         |         |
|------------------|---------------------|-----|-----|-----------|--------------|---------|---------|
| LAPTM4B*2 allele | E47 [T00207]        | 332 | 338 | 5.510905  | TCCAGCA      | 0.22217 | 0.31418 |
| LAPTM4B*2 allele | E47 [T00207]        | 351 | 357 | 5.510905  | TCCAGCA      | 0.22217 | 0.31418 |
| LAPTM4B*2 allele | E47 [T00207]        | 357 | 363 | 3.634763  | AGCTGGC      | 0.03174 | 0.04895 |
| LAPTM4B*2 allele | E47 [T00207]        | 361 | 367 | 4.627662  | GGCTGGA      | 0.25391 | 0.37276 |
| LAPTM4B*2 allele | SRY [T00997]        | 121 | 127 | 6.723683  | CGACAAG      | 0.25391 | 0.2916  |
| LAPTM4B*2 allele | MBF1 [T00492]       | 141 | 151 | 14.636473 | CTCAAAAAAAAA | 0.06025 | 0.01851 |
| LAPTM4B*2 allele | MBF1 [T00492]       | 192 | 202 | 14.636473 | GACTAAAAGAA  | 0.06025 | 0.01851 |
| LAPTM4B*2 allele | STAT5A [T04683]     | 170 | 173 | 0         | GGAA         | 2.03125 | 2.09129 |
| LAPTM4B*2 allele | STAT5A [T04683]     | 185 | 188 | 0         | GGAA         | 2.03125 | 2.09129 |
| LAPTM4B*2 allele | STAT5A [T04683]     | 247 | 250 | 0         | GGAA         | 2.03125 | 2.09129 |
| LAPTM4B*2 allele | POU3F2 [T00630]     | 176 | 182 | 9.725533  | AAATCGC      | 0.06348 | 0.04187 |
| LAPTM4B*2 allele | POU3F2 [T00630]     | 305 | 311 | 0.252682  | TGGATTT      | 0.19043 | 0.05446 |
| LAPTM4B*2 allele | FOXP3 [T04280]      | 175 | 183 | 14.668224 | AAAATCGCA    | 0.00793 | 0.00413 |
| LAPTM4B*2 allele | c-Ets-2 [T00113]    | 184 | 191 | 2.827022  | AGGAACTA     | 0.09521 | 0.07905 |
| LAPTM4B*2 allele | c-Ets-2 [T00113]    | 246 | 253 | 4.629332  | AGGAAGGC     | 0.14282 | 0.14249 |
| LAPTM4B*2 allele | c-Myb [T00137]      | 186 | 193 | 13.847077 | GAACTAGA     | 0.06348 | 0.03251 |
| LAPTM4B*2 allele | c-Myb [T00137]      | 217 | 224 | 12.979731 | TGGAGTTA     | 0.14282 | 0.07497 |
| LAPTM4B*2 allele | AP-3 (2) [T00039]   | 194 | 200 | 11.290546 | CTAAAAG      | 0.38086 | 0.20639 |
| LAPTM4B*2 allele | HNF-3beta [T02513]  | 195 | 201 | 3.504129  | TAAAAGA      | 0.31738 | 0.134   |
| LAPTM4B*2 allele | HNF-3beta [T02513]  | 306 | 312 | 3.66377   | GGATTTA      | 0.31738 | 0.134   |
| LAPTM4B*2 allele | YY1 [T00915]        | 101 | 107 | 7.55849   | CCATTGC      | 0.34912 | 0.35388 |
| LAPTM4B*2 allele | YY1 [T00915]        | 213 | 219 | 8.35288   | TGAATGG      | 0.31738 | 0.2638  |
| LAPTM4B*2 allele | YY1 [T00915]        | 301 | 307 | 7.441476  | CTGATGG      | 0.34912 | 0.35388 |
| LAPTM4B*2 allele | YY1 [T00915]        | 395 | 401 | 3.973697  | CACATGG      | 0.12695 | 0.10167 |
| LAPTM4B*2 allele | Hlf [T01071]        | 221 | 229 | 6.667463  | GTTACACGA    | 0.02579 | 0.01154 |
| LAPTM4B*2 allele | Myf-3 [T00519]      | 234 | 241 | 2.45354   | CCAGATGA     | 0.11108 | 0.07762 |
| LAPTM4B*2 allele | Myf-3 [T00519]      | 336 | 343 | 0         | GCAGCTGC     | 0.14282 | 0.20809 |
| LAPTM4B*2 allele | Myf-3 [T00519]      | 355 | 362 | 0         | GCAGCTGG     | 0.14282 | 0.20809 |
| LAPTM4B*2 allele | MyoD [T00525]       | 234 | 241 | 2.45354   | CCAGATGA     | 0.11108 | 0.07762 |
| LAPTM4B*2 allele | MyoD [T00525]       | 336 | 343 | 0         | GCAGCTGC     | 0.14282 | 0.20809 |
| LAPTM4B*2 allele | MyoD [T00525]       | 355 | 362 | 0         | GCAGCTGG     | 0.14282 | 0.20809 |
| LAPTM4B*2 allele | NF-X3 [T01514]      | 235 | 242 | 5.226274  | CAGATGAA     | 0.08728 | 0.07246 |
| LAPTM4B*2 allele | NF-X3 [T01514]      | 475 | 482 | 8.793097  | CAGAAGCT     | 0.14282 | 0.13528 |
| LAPTM4B*2 allele | LCR-F1 [T01599]     | 238 | 243 | 5.346725  | ATGAAA       | 0.63477 | 0.33882 |
| LAPTM4B*2 allele | LCR-F1 [T01599]     | 375 | 380 | 0.029165  | ATGACC       | 0.50781 | 0.33515 |
| LAPTM4B*2 allele | p53 [T00671]        | 45  | 51  | 0.525867  | GGGCAGG      | 0.06348 | 0.15461 |
| LAPTM4B*2 allele | p53 [T00671]        | 118 | 124 | 8.914655  | GGGCGAC      | 0.31738 | 0.69283 |
| LAPTM4B*2 allele | p53 [T00671]        | 249 | 255 | 9.164941  | AAGCCC       | 0.31738 | 0.69283 |
| LAPTM4B*2 allele | p53 [T00671]        | 269 | 275 | 7.959461  | GGGCCGA      | 0.19043 | 0.36751 |
| LAPTM4B*2 allele | p53 [T00671]        | 365 | 371 | 9.966389  | GGAGCCC      | 0.12695 | 0.38348 |
| LAPTM4B*2 allele | p53 [T00671]        | 407 | 413 | 7.700559  | TCCGCC       | 0.12695 | 0.24071 |
| LAPTM4B*2 allele | p53 [T00671]        | 412 | 418 | 3.891597  | CCCGCC       | 0.19043 | 0.52463 |
| LAPTM4B*2 allele | p53 [T00671]        | 508 | 514 | 3.624632  | CAGCCC       | 0.09521 | 0.20746 |
| LAPTM4B*2 allele | EIIaE-A [T00246]    | 43  | 49  | 14.472869 | TTGGGCA      | 0.8252  | 1.50151 |
| LAPTM4B*2 allele | EIIaE-A [T00246]    | 66  | 72  | 10.118218 | CCGGGAG      | 0.57129 | 1.10588 |
| LAPTM4B*2 allele | EIIaE-A [T00246]    | 116 | 122 | 10.118218 | CTGGGCG      | 0.57129 | 1.10588 |
| LAPTM4B*2 allele | EIIaE-A [T00246]    | 167 | 173 | 8.709302  | AAGGGAA      | 0.57129 | 1.22589 |
| LAPTM4B*2 allele | EIIaE-A [T00246]    | 251 | 257 | 14.472869 | GGCCCGG      | 0.8252  | 1.50151 |
| LAPTM4B*2 allele | EIIaE-A [T00246]    | 267 | 273 | 10.118218 | CAGGGCC      | 0.57129 | 1.10588 |
| LAPTM4B*2 allele | EIIaE-A [T00246]    | 277 | 283 | 14.472869 | TAGGGGA      | 0.8252  | 1.50151 |
| LAPTM4B*2 allele | EIIaE-A [T00246]    | 290 | 296 | 8.709302  | GAGGGTG      | 0.57129 | 1.22589 |
| LAPTM4B*2 allele | EIIaE-A [T00246]    | 317 | 323 | 14.472869 | CCGGGTG      | 0.8252  | 1.50151 |
| LAPTM4B*2 allele | EIIaE-A [T00246]    | 367 | 373 | 13.063953 | AGCCCGC      | 0.8252  | 1.64315 |
| LAPTM4B*2 allele | EIIaE-A [T00246]    | 409 | 415 | 10.118218 | CGCCCGC      | 0.57129 | 1.10588 |
| LAPTM4B*2 allele | EIIaE-A [T00246]    | 414 | 420 | 8.709302  | CGCCCCC      | 0.57129 | 1.22589 |
| LAPTM4B*2 allele | EIIaE-A [T00246]    | 416 | 422 | 8.709302  | CCCCCTC      | 0.57129 | 1.22589 |
| LAPTM4B*2 allele | EIIaE-A [T00246]    | 420 | 426 | 14.472869 | CTCCCC       | 0.8252  | 1.50151 |
| LAPTM4B*2 allele | EIIaE-A [T00246]    | 459 | 465 | 13.063953 | AAGGGTA      | 0.8252  | 1.64315 |
| LAPTM4B*2 allele | EIIaE-A [T00246]    | 510 | 516 | 13.063953 | GGCCCGC      | 0.8252  | 1.64315 |
| LAPTM4B*2 allele | NHP-1 [T00621]      | 256 | 262 | 9.83      | GGACCTC      | 0.47607 | 0.38993 |
| LAPTM4B*2 allele | NHP-1 [T00621]      | 376 | 382 | 9.83      | TGACGTC      | 0.47607 | 0.38993 |
| LAPTM4B*2 allele | NHP-1 [T00621]      | 377 | 383 | 9.83      | GACGTCA      | 0.47607 | 0.38993 |
| LAPTM4B*2 allele | NHP-1 [T00621]      | 390 | 396 | 6.571346  | CGGGTCA      | 0.09521 | 0.12898 |
| LAPTM4B*2 allele | TFIIIB [T00818]     | 263 | 270 | 11.657154 | CACTCAGG     | 0.2063  | 0.2925  |
| LAPTM4B*2 allele | EBF [T05427]        | 263 | 273 | 6.8994    | CACTCAGGGCC  | 0.00793 | 0.01932 |
| LAPTM4B*2 allele | MZF-1 [T00529]      | 277 | 283 | 2.220412  | TAGGGGA      | 0.12695 | 0.17016 |
| LAPTM4B*2 allele | MZF-1 [T00529]      | 421 | 427 | 1.166538  | TCCCGGT      | 0.12695 | 0.21649 |
| LAPTM4B*2 allele | MZF-1 [T00529]      | 427 | 433 | 0.112664  | TCCCGCC      | 0.12695 | 0.31845 |
| LAPTM4B*2 allele | NF-kappaB1 [T00593] | 279 | 290 | 14.056581 | GGGGACTGGCCG | 0.01271 | 0.02532 |
| LAPTM4B*2 allele | Pax-5 [T00070]      | 295 | 301 | 7.762216  | TGCACGC      | 0.06348 | 0.12759 |

|                  |                         |     |     |           |               |         |         |
|------------------|-------------------------|-----|-----|-----------|---------------|---------|---------|
| LAPTM4B*2 allele | AhR:Arnt [T05394]       | 297 | 305 | 9.325207  | CACGCTGAT     | 0.05356 | 0.05649 |
| LAPTM4B*2 allele | OU2F2 (Oct-2.1) [T0064] | 172 | 179 | 8.36845   | AAGAAAAT      | 0.06348 | 0.0172  |
| LAPTM4B*2 allele | OU2F2 (Oct-2.1) [T0064] | 308 | 315 | 11.697988 | ATTTACTC      | 0.05554 | 0.01943 |
| LAPTM4B*2 allele | RAR-gamma [T00720]      | 311 | 318 | 5.085116  | TACTCACC      | 0.06348 | 0.06732 |
| LAPTM4B*2 allele | Myf-5 [T00521]          | 329 | 341 | 11.871492 | AGCTCCAGCAGCT | 0.01676 | 0.0256  |
| LAPTM4B*2 allele | Myf-5 [T00521]          | 332 | 344 | 14.24579  | TCCAGCAGCTGCT | 0.0312  | 0.05065 |
| LAPTM4B*2 allele | Myf-5 [T00521]          | 348 | 360 | 11.871492 | AGCTCCAGCAGCT | 0.01676 | 0.0256  |
| LAPTM4B*2 allele | Myf-5 [T00521]          | 351 | 363 | 7.122895  | TCCAGCAGCTGGC | 0.00277 | 0.00412 |
| LAPTM4B*2 allele | Myf-5 [T00521]          | 434 | 446 | 14.24579  | CGCTGCAGCGGTC | 0.0312  | 0.05065 |
| LAPTM4B*2 allele | AP-4 [T00036]           | 333 | 343 | 2.654666  | CCAGCAGCTGC   | 0.00471 | 0.00621 |
| LAPTM4B*2 allele | AP-4 [T00036]           | 352 | 362 | 1.268101  | CCAGCAGCTGG   | 0.00384 | 0.00573 |
| LAPTM4B*2 allele | Tal-1 [T00790]          | 332 | 342 | 14.153038 | TCCAGCAGCTG   | 0.04017 | 0.04655 |
| LAPTM4B*2 allele | Tal-1 [T00790]          | 337 | 347 | 9.947032  | CAGCTGCTTGG   | 0.01339 | 0.01658 |
| LAPTM4B*2 allele | Tal-1 [T00790]          | 351 | 361 | 14.153038 | TCCAGCAGCTG   | 0.04017 | 0.04655 |
| LAPTM4B*2 allele | Tal-1 [T00790]          | 356 | 366 | 8.412013  | CAGCTGGCTGG   | 0.02008 | 0.02862 |
| LAPTM4B*2 allele | DP-1 [T01548]           | 365 | 374 | 14.492168 | GGAGCCCGCG    | 0.05356 | 0.17372 |
| LAPTM4B*2 allele | DP-1 [T01548]           | 425 | 434 | 12.705831 | CGTCCCGGCC    | 0.05356 | 0.15075 |
| LAPTM4B*2 allele | E2F-1 [T01542]          | 72  | 78  | 5.331496  | GGCGGAG       | 0.12695 | 0.43536 |
| LAPTM4B*2 allele | E2F-1 [T01542]          | 286 | 292 | 5.331496  | GGCGGAG       | 0.12695 | 0.43536 |
| LAPTM4B*2 allele | E2F-1 [T01542]          | 368 | 374 | 5.944817  | GCCCGCC       | 0.12695 | 0.4156  |
| LAPTM4B*2 allele | E2F-1 [T01542]          | 406 | 412 | 7.879274  | GTCCCGC       | 0.31738 | 0.77859 |
| LAPTM4B*2 allele | E2F-1 [T01542]          | 411 | 417 | 3.397038  | CCCCGCC       | 0.19043 | 0.45057 |
| LAPTM4B*2 allele | E2F-1 [T01542]          | 428 | 434 | 3.397038  | CCCCGCC       | 0.19043 | 0.45057 |
| LAPTM4B*2 allele | E2F-1 [T01542]          | 431 | 437 | 7.060495  | CGCCGCT       | 0.12695 | 0.27655 |
| LAPTM4B*2 allele | E2F-1 [T01542]          | 440 | 446 | 10.575502 | AGCGGTC       | 0.12695 | 0.16594 |
| LAPTM4B*2 allele | E2F-1 [T01542]          | 511 | 517 | 5.944817  | GCCCGCG       | 0.12695 | 0.4156  |
| LAPTM4B*2 allele | USF2b [T02377]          | 372 | 379 | 12.629773 | GCGATGAC      | 0.57129 | 0.45763 |
| LAPTM4B*2 allele | USF2b [T02377]          | 380 | 387 | 11.374018 | GTCACGGA      | 0.28564 | 0.36021 |
| LAPTM4B*2 allele | USF2b [T02377]          | 393 | 400 | 1.255756  | GTCACATG      | 0.06348 | 0.04771 |
| LAPTM4B*2 allele | c-Jun [T00132]          | 376 | 382 | 4.469954  | TGACGTC       | 0.22217 | 0.19361 |
| LAPTM4B*2 allele | c-Jun [T00132]          | 377 | 383 | 4.469954  | GACGTCA       | 0.22217 | 0.19361 |
| LAPTM4B*2 allele | c-Jun [T00132]          | 390 | 396 | 4.522753  | CGGGTCA       | 0.22217 | 0.19361 |
| LAPTM4B*2 allele | CREMalpha [T01803]      | 372 | 383 | 7.13467   | GCGATGACGTCA  | 0.00781 | 0.00451 |
| LAPTM4B*2 allele | CREMalpha [T01803]      | 376 | 387 | 5.668944  | TGACGTACCGGA  | 0.0026  | 0.00192 |
| LAPTM4B*2 allele | CREB [T00163]           | 375 | 383 | 0.032925  | ATGACGTCA     | 0.00793 | 0.00573 |
| LAPTM4B*2 allele | CREB [T00163]           | 376 | 384 | 0.024694  | TGACGTAC      | 0.00793 | 0.00573 |
| LAPTM4B*2 allele | ATF-2 [T00167]          | 375 | 383 | 0.034254  | ATGACGTCA     | 0.00793 | 0.00573 |
| LAPTM4B*2 allele | ATF-2 [T00167]          | 376 | 384 | 0         | TGACGTAC      | 0.00793 | 0.00573 |
| LAPTM4B*2 allele | ATF [T00051]            | 375 | 383 | 0.462475  | ATGACGTCA     | 0.00992 | 0.0069  |
| LAPTM4B*2 allele | ATF [T00051]            | 376 | 384 | 0.313871  | TGACGTAC      | 0.00992 | 0.0069  |
| LAPTM4B*2 allele | E4F [T00222]            | 376 | 384 | 12.100443 | TGACGTAC      | 0.04761 | 0.02929 |
| LAPTM4B*2 allele | c-Fos [T00123]          | 375 | 382 | 10.285697 | ATGACGTC      | 0.12695 | 0.08854 |
| LAPTM4B*2 allele | c-Fos [T00123]          | 377 | 384 | 11.816087 | GACGTAC       | 0.07141 | 0.04964 |
| LAPTM4B*2 allele | c-Fos [T00123]          | 390 | 397 | 11.455199 | CGGGTCA       | 0.11108 | 0.11085 |
| LAPTM4B*2 allele | ATF-1 [T00968]          | 374 | 384 | 2.828372  | GATGACGTAC    | 0.00174 | 0.00198 |
| LAPTM4B*2 allele | ATF-1 [T00968]          | 375 | 385 | 3.669682  | ATGACGTACCG   | 0.00446 | 0.00424 |
| LAPTM4B*2 allele | Pax-2 [T01823]          | 373 | 379 | 3.495993  | CGATGAC       | 0.15869 | 0.13025 |
| LAPTM4B*2 allele | Pax-2 [T01823]          | 380 | 386 | 0.127056  | GTCACGG       | 0.09521 | 0.11036 |
| LAPTM4B*2 allele | Pax-2 [T01823]          | 393 | 399 | 5.131658  | GTCACAT       | 0.31738 | 0.20576 |
| LAPTM4B*2 allele | T3R-alpha1 [T01152]     | 386 | 396 | 13.79108  | GACTCGGGTCA   | 0.08629 | 0.06956 |
| LAPTM4B*2 allele | ER-beta [T04651]        | 388 | 396 | 9.122536  | CTCGGGTCA     | 0.00793 | 0.00932 |
| LAPTM4B*2 allele | RAR-beta [T00721]       | 389 | 396 | 2.799654  | TCGGGTCA      | 0.05554 | 0.08434 |
| LAPTM4B*2 allele | ER-alpha [T00261]       | 390 | 397 | 1.367305  | CGGGTCA       | 0.10315 | 0.10323 |
| LAPTM4B*2 allele | NFI/CTF [T00094]        | 35  | 42  | 2.683003  | TCGGTTGG      | 0.01587 | 0.02556 |
| LAPTM4B*2 allele | NFI/CTF [T00094]        | 39  | 46  | 8.241664  | TTGGTTGG      | 0.04761 | 0.05623 |
| LAPTM4B*2 allele | NFI/CTF [T00094]        | 321 | 328 | 5.558661  | GTGCTTGG      | 0.14282 | 0.12536 |
| LAPTM4B*2 allele | NFI/CTF [T00094]        | 340 | 347 | 6.786076  | CTGCTTGG      | 0.19043 | 0.18766 |
| LAPTM4B*2 allele | NFI/CTF [T00094]        | 402 | 409 | 13.146004 | CCAAGTCC      | 0.28564 | 0.16129 |
| LAPTM4B*2 allele | Sp3 [T02338]            | 406 | 414 | 5.19869   | GTCGCCCC      | 0.0238  | 0.08976 |
| LAPTM4B*2 allele | Sp3 [T02338]            | 411 | 419 | 0         | CCCCGCCCC     | 0.00198 | 0.01404 |
| LAPTM4B*2 allele | GCF [T00320]            | 409 | 419 | 5.946992  | CGCCCCGCCCC   | 0.00335 | 0.02016 |
| LAPTM4B*2 allele | MAZ [T00490]            | 412 | 422 | 14.391959 | CCCCGCCCTC    | 0.03645 | 0.15404 |
| LAPTM4B*2 allele | MAZ [T00490]            | 418 | 428 | 1.454467  | CCCTCCCCGTC   | 0.00434 | 0.01712 |
| LAPTM4B*2 allele | MAZ [T00490]            | 424 | 434 | 14.561456 | CCGTCCCCGCC   | 0.03645 | 0.15404 |
| LAPTM4B*2 allele | WT1 [T00899]            | 414 | 424 | 7.524526  | CGCCCCCTCCC   | 0.00397 | 0.02354 |
| LAPTM4B*2 allele | WT1 [T00899]            | 425 | 435 | 11.883285 | CGTCCCCGCCG   | 0.02678 | 0.10948 |
| LAPTM4B*2 allele | R1 [T00711]             | 287 | 298 | 11.545139 | GCGGAGGGTGCA  | 0.01339 | 0.03527 |
| LAPTM4B*2 allele | R1 [T00711]             | 414 | 425 | 8.256952  | CGCCCCCTCCCC  | 0.00967 | 0.02533 |
| LAPTM4B*2 allele | LF-A1 [T00467]          | 7   | 13  | 9.701266  | GGTGGCA       | 0.57129 | 0.77751 |
| LAPTM4B*2 allele | LF-A1 [T00467]          | 43  | 49  | 1.561557  | TTGGGCA       | 0.28564 | 0.50919 |



|                  |                         |     |     |           |               |         |         |
|------------------|-------------------------|-----|-----|-----------|---------------|---------|---------|
| LAPTM4B*2 allele | LF-A1 [T00467]          | 470 | 476 | 8.920488  | CCCGGCA       | 0.38086 | 0.53601 |
| LAPTM4B*2 allele | LF-A1 [T00467]          | 503 | 509 | 5.631412  | GGAGGCA       | 0.28564 | 0.33644 |
| LAPTM4B*2 allele | GATA-1 [T00306]         | 495 | 500 | 1.908093  | GGTATC        | 0.76172 | 0.37136 |
| LAPTM4B*2 allele | WT1 I -KTS [T00900]     | 366 | 375 | 14.457704 | GAGCCCGCGA    | 0.04662 | 0.19835 |
| LAPTM4B*2 allele | WT1 I -KTS [T00900]     | 413 | 422 | 10.053856 | CCGCCCCCTC    | 0.00793 | 0.04425 |
| LAPTM4B*2 allele | WT1 I -KTS [T00900]     | 424 | 433 | 14.586256 | CCGTCCCCGC    | 0.04662 | 0.19835 |
| LAPTM4B*2 allele | WT1 -KTS [T01839]       | 366 | 375 | 14.457704 | GAGCCCGCGA    | 0.04662 | 0.19835 |
| LAPTM4B*2 allele | WT1 -KTS [T01839]       | 413 | 422 | 10.053856 | CCGCCCCCTC    | 0.00793 | 0.04425 |
| LAPTM4B*2 allele | WT1 -KTS [T01839]       | 424 | 433 | 14.586256 | CCGTCCCCGC    | 0.04662 | 0.19835 |
| LAPTM4B*2 allele | IA-1 [T05887]           | 413 | 425 | 6.673112  | CCGCCCCCTCCCC | 0.00101 | 0.00392 |
| LAPTM4B*2 allele | ETF [T00270]            | 406 | 414 | 1.261043  | GTCCGCCCC     | 0.02975 | 0.09859 |
| LAPTM4B*2 allele | ETF [T00270]            | 411 | 419 | 0         | CCCCGCCCC     | 0.00198 | 0.01404 |
| LAPTM4B*2 allele | NF-1 [T00539]           | 401 | 405 | 0         | GCCAA         | 0.50781 | 0.56301 |
| LAPTM4B*2 allele | USF2 [T00878]           | 392 | 400 | 3.706299  | GGTCACATG     | 0.0119  | 0.01097 |
| LAPTM4B*2 allele | T3R-beta2 [T01350]      | 389 | 397 | 0.763705  | TCGGGTAC      | 0.00397 | 0.004   |
| LAPTM4B*2 allele | ARP-1 [T00045]          | 388 | 396 | 3.301012  | CTCGGGTCA     | 0.00793 | 0.0085  |
| LAPTM4B*2 allele | E4F1 [T00223]           | 376 | 384 | 0.123447  | TGACGTAC      | 0.03174 | 0.03032 |
| LAPTM4B*2 allele | E12 [T00204]            | 332 | 344 | 14.476348 | TCCAGCAGCTGCT | 0.00781 | 0.0123  |
| LAPTM4B*2 allele | E12 [T00204]            | 351 | 363 | 14.548481 | TCCAGCAGCTGGC | 0.00781 | 0.0123  |
| LAPTM4B*2 allele | TFII-I [T00824]         | 303 | 313 | 6.490932  | GATGGATTAC    | 0.00793 | 0.00749 |
| LAPTM4B*2 allele | Pbx1b [T02087]          | 236 | 245 | 14.774452 | AGATGAAAGA    | 0.05356 | 0.03264 |
| LAPTM4B*2 allele | Pbx1b [T02087]          | 299 | 308 | 8.781358  | CGCTGATGGA    | 0.02678 | 0.0106  |
| LAPTM4B*2 allele | Arnt [T01346]           | 297 | 305 | 10.586083 | CACGCTGAT     | 0.0238  | 0.03455 |
| LAPTM4B*2 allele | AhR [T01795]            | 294 | 301 | 2.665859  | GTGCACGC      | 0.11902 | 0.19485 |
| LAPTM4B*2 allele | HMG I(Y) [T02368]       | 170 | 176 | 5.151271  | GGAAGAA       | 0.15869 | 0.11562 |
| LAPTM4B*2 allele | HMG I(Y) [T02368]       | 185 | 191 | 4.951498  | GGAACTA       | 0.15869 | 0.11562 |
| LAPTM4B*2 allele | HMG I(Y) [T02368]       | 247 | 253 | 7.014009  | GGAAGGC       | 0.15869 | 0.28039 |
| LAPTM4B*2 allele | STAT4 [T01577]          | 170 | 175 | 4.411765  | GGAAGA        | 0.50781 | 0.64878 |
| LAPTM4B*2 allele | STAT4 [T01577]          | 185 | 190 | 1.470588  | GGAACT        | 0.50781 | 0.40202 |
| LAPTM4B*2 allele | STAT4 [T01577]          | 247 | 252 | 5.882353  | GGAAGG        | 0.12695 | 0.21649 |
| LAPTM4B*2 allele | c-Ets-1 [T00112]        | 168 | 174 | 6.471844  | AGGGAAG       | 0.12695 | 0.17596 |
| LAPTM4B*2 allele | c-Ets-1 [T00112]        | 183 | 189 | 4.46609   | AAGGAAC       | 0.15869 | 0.14819 |
| LAPTM4B*2 allele | c-Ets-1 [T00112]        | 245 | 251 | 0.484609  | AAGGAAG       | 0.09521 | 0.10632 |
| LAPTM4B*2 allele | box binding factor [T00 | 239 | 248 | 8.695301  | TGAAAGAAGG    | 0.05802 | 0.04399 |
| LAPTM4B*2 allele | HSF1 (long) [T01042]    | 210 | 217 | 0         | CCTTGAAT      | 0.0238  | 0.01528 |
| LAPTM4B*2 allele | HSF1 (short) [T02104]   | 210 | 217 | 0         | CCTTGAAT      | 0.0238  | 0.01528 |
| LAPTM4B*2 allele | RFX1 [T01673]           | 79  | 87  | 7.500326  | GTTGCAGTG     | 0.0238  | 0.03075 |
| LAPTM4B*2 allele | HNF-1B [T01950]         | 22  | 29  | 14.384751 | TAATCCCA      | 0.11108 | 0.05074 |
| LAPTM4B*2 allele | NFdeltaE3A [T00976]     | 4   | 13  | 13.153012 | TGTGGTGGCA    | 0.01785 | 0.01622 |
| LAPTM4B*2 allele | AML1a [T02256]          | 0   | 9   | 7.146755  | CGGGTGTGGT    | 0.01438 | 0.01537 |

**TableS3.** Primers for luciferase plasmids construction

| Name                     |            | Sequence                             |
|--------------------------|------------|--------------------------------------|
| LAPTM4B 5'UTR            | Sense      | 5'-CTCGAGCCCTTGAATGGAGTTACACGAACG-3' |
|                          | Anti-sense | 5'-AAGCTTCTGCCTCCTCGATACCCCGAGA-3'   |
| LAPTM4B 5'UTR<br>SOE-PCR | Sense      | 5'-CAGTCAACTGCTGGAGCCCGCGATGAC-3'    |
|                          | Anti-sense | 5'-CAGCAGTTGACTGGAGCTCCAAGCAC-3'     |

**Table S4.** The siRNA target sequences of AP4

| Name               | Sequence                    |
|--------------------|-----------------------------|
| TFAP4 scrambled nc | 5'-GGCATCTTCGCAGTTACCT-3'   |
| TFAP4 siRNA #5     | 5'-CACCATCGTGCAGGCAATCCA-3' |
| TFAP4 siRNA #4     | 5'-CAAGGAGAAGCTATTATATTT-3' |
| TFAP4 siRNA#2      | 5'-CCTGGGATTGTCAGCCTTCAA-3' |

**Table S5.** The primer of AP4, LAPTM4B and GAPDH

|                 | Sequence                      |
|-----------------|-------------------------------|
| AP4 forward     | 5'-GCAGGCAATCCAGCACAT-3'      |
| AP4 reverse     | 5'-GGAGGCGGTGTCAGAGGT-3'      |
| LAPTM4B forward | 5'-AAGACCATTAGAAAGCACCAGG-3'  |
| LAPTM4B reverse | 5'-ACCAATCTAGGGCAGAACACTTA-3' |
| GAPDH forward   | 5'-ACGGATTTGGTCGTATTGGGCG-3'  |
| GAPDH reverse   | 5'-CTCCTGGAAGATGGTGATGG-3'    |

**Table S6.** Antibodies used in WB

| Name                 | Company and ID      |
|----------------------|---------------------|
| anti-pAkt            | CST4060             |
| anti-pGSK3           | CST5558             |
| anti-Akt             | CST9272             |
| anti-c-Myc           | CST5605             |
| anti-Cyclin E1       | CST4129             |
| anti-p27             | CST3686             |
| anti-N-cadherin      | CST13116            |
| anti-p21             | CST2947             |
| anti-Caspase-3       | CST9662             |
| anti-PARP            | CST9532             |
| anti- $\beta$ -actin | CST3700             |
| anti-E-cadherin      | abcam40772          |
| anti-p-c-myc(Thr58)  | abcam28822          |
| anti-Vimentin        | abcam92547          |
| anti-TFAP4           | Santa Cruz sc-18593 |
| anti-LAPTM4B         | ABGENT AP20870a     |

Table S7. Relationship between AP4 expression and clinicopathological features of HCC

| Variables                         | Patients | AP4 expression |      | P <sup>a</sup> |
|-----------------------------------|----------|----------------|------|----------------|
|                                   |          | Low            | High |                |
| All cases                         | 117      |                |      |                |
| Gender                            |          |                |      | 0.659          |
| Male                              | 90       | 39             | 51   |                |
| Female                            | 27       | 10             | 17   |                |
| Age                               |          |                |      | 0.704          |
| <50                               | 49       | 22             | 27   |                |
| ≥50                               | 68       | 27             | 41   |                |
| Cirrhosis                         |          |                |      | 0.091          |
| Yes                               | 64       | 22             | 42   |                |
| No                                | 53       | 27             | 26   |                |
| Viral status                      |          |                |      | 0.064          |
| Yes                               | 83       | 30             | 53   |                |
| No                                | 34       | 19             | 15   |                |
| Tumor size                        |          |                |      | 0.039          |
| <5cm                              | 51       | 27             | 24   |                |
| ≥5cm                              | 66       | 22             | 44   |                |
| Vessel carcinoma embolus          |          |                |      | 0.003          |
| Yes                               | 58       | 16             | 42   |                |
| No                                | 59       | 33             | 26   |                |
| Histopathological differentiation |          |                |      | 0              |
| WD                                | 24       | 19             | 5    |                |
| MD                                | 61       | 23             | 38   |                |
| PD                                | 32       | 7              | 25   |                |
| TNM stage                         |          |                |      | 0.001          |
| I-II                              | 43       | 22             | 16   |                |
| III-IV                            | 74       | 22             | 52   |                |
| Serum AFP level                   |          |                |      | 0.703          |
| <7ng/ml                           | 47       | 21             | 26   |                |
| ≥7ng/ml                           | 70       | 28             | 42   |                |
| Recurrence                        |          |                |      | 0.27           |
| Yes                               | 27       | 14             | 13   |                |
| No                                | 90       | 35             | 55   |                |

a. Chi-square test

Table S8. Relationship between LAPTM4B-35 expression and clinicopathological features of HCC

| Variables                         | Patients | LAPTM4B expression |      | P <sup>a</sup> |
|-----------------------------------|----------|--------------------|------|----------------|
|                                   |          | Low                | High |                |
| All cases                         | 117      |                    |      |                |
| Gender                            |          |                    |      | 0.189          |
| Male                              | 90       | 40                 | 50   |                |
| Female                            | 27       | 8                  | 19   |                |
| Age                               |          |                    |      | 1              |
| <50                               | 49       | 20                 | 29   |                |
| ≥50                               | 68       | 28                 | 40   |                |
| Cirrhosis                         |          |                    |      | 0.008          |
| Yes                               | 64       | 19                 | 45   |                |
| No                                | 53       | 29                 | 24   |                |
| Viral status                      |          |                    |      | 0.041          |
| Yes                               | 83       | 29                 | 54   |                |
| No                                | 34       | 19                 | 15   |                |
| Tumor size                        |          |                    |      | 0.009          |
| <5cm                              | 51       | 28                 | 23   |                |
| ≥5cm                              | 66       | 20                 | 46   |                |
| Vessel carcinoma embolus          |          |                    |      | 0              |
| Yes                               | 58       | 14                 | 44   |                |
| No                                | 59       | 34                 | 25   |                |
| Histopathological differentiation |          |                    |      | 0              |
| WD                                | 24       | 18                 | 6    |                |
| MD                                | 61       | 22                 | 39   |                |
| PD                                | 32       | 8                  | 24   |                |
| TNM stage                         |          |                    |      | 0              |
| I-II                              | 43       | 30                 | 13   |                |
| III-IV                            | 74       | 18                 | 56   |                |
| Serum AFP level                   |          |                    |      | 1              |
| <7ng/ml                           | 47       | 19                 | 28   |                |
| ≥7ng/ml                           | 70       | 29                 | 41   |                |
| Recurrence                        |          |                    |      | 0.824          |
| Yes                               | 27       | 12                 | 15   |                |
| No                                | 90       | 36                 | 54   |                |

a. Chi-square test
